# Supplementary material
Source: PubMed Central journal article supplement (PMC8246800)
Supplement: djaa193_supplementary_data.pdf [file djaa193_supplementary_data.pdf]

## Supplementary Materials

Supplementary table 1  
Tumoral testing

| Platform                         | Samples          | DNA extraction method*                                      | NGS target enrichment technology | Kit*                                                         | Instrument                        | Limit of detection                                                       | Minimal coverage (X) | Confirmation of variants                            | LGR detection                       | Workflow time (days) | Bioinformatic pipeline                                                                                                                         | Positive control                             | Variant annotation database                                                           | External quality assessment  |
|----------------------------------|------------------|-------------------------------------------------------------|----------------------------------|--------------------------------------------------------------|-----------------------------------|--------------------------------------------------------------------------|----------------------|-----------------------------------------------------|-------------------------------------|----------------------|------------------------------------------------------------------------------------------------------------------------------------------------|----------------------------------------------|---------------------------------------------------------------------------------------|------------------------------|
| APHP (Cochin and HEGP hospitals) | FFPE tumor block | Maxwell® 16 FFPE Tissue LEV DNA Purification Kit (Promega)* | Amplicons                        | Ion AmpliSeq Custom Panel_Design ID_IAD77882 (thermofisher)* | PGM and Ion Proton (Thermofisher) | 5% for SNV and deletion/insertion (20% for deletions within homopolymer) | 300                  | Analyses performed on the HEGP and Cochin platforms | No detection                        | 15                   | Torrent Suite™ Software variantCaller plugin. Coverage plugin Json file (plugin configuration) available Polydiag (Université Paris Descartes) | Home-made mutated control in each run        | BRCA-share (UMD) ClinVar BRCA UTAH Galaxy platform: galaxy.org / Safir2.4 report tool | EMQN and Gen\$stiss programs |
| Baclesse                         | FFPE tumor block | QIAamp DNA FFPE Tissue Kit (Qiagen)*                        | Hybrid capture                   | BRCA1/2 custom panel for Sureselect XT (Agilent)*            | Nextseq500-MiSeq (Illumina)       | 5%                                                                       | 300                  | No confirmation                                     | No detection                        | 16                   | BWA-GATK / Haplotype caller / Outlyser                                                                                                         | Home-made mutated control in each run        | Alamut, ClinVar, BRCA-Share (UMD) and home-made database                              | EMQN and Gen\$stiss programs |
| Bergonié                         | FFPE tumor block | QIAamp DNA FFPE (Qiagen)*                                   | Amplicons                        | GeneRead DNaseq Targeted Panels V2 (Qiagen)*                 | PGM (Thermofisher)                | 10%                                                                      | 300                  | Sanger                                              | No detection                        | 15                   | Torrent Suite Software versions 4.4.2; 4.6.1; 5.2.2                                                                                            | HD795 mutated Standard (Horizon) in each run | 1000g, Cosmic70, snp138, ClinVar, libj26_all, BRCA-Share (UMD)                        | EMQN and Gen\$stiss programs |
| Curie                            | FFPE tumor block | Nucleospin tissue (Macherey-Nagel)*                         | Amplicons                        | Therascreen BRCA1/2 NGS FFPE (Qiagen)*                       | Miseq (illumina)                  | 10%                                                                      | 300                  | Sanger                                              | MLPA (only if LGR suspected in NGS) | 15                   | Home-made                                                                                                                                      | HD795 mutated Standard (Horizon) in each run | Alamut, BRCA-share (UMD), ClinVar and home-made database                              | EMQN and Gen\$stiss programs |

|                |                  |                       |                |                                                                       |                                           |    |     |        |                                              |    |           |                                              |                                                 |                            |
|----------------|------------------|-----------------------|----------------|-----------------------------------------------------------------------|-------------------------------------------|----|-----|--------|----------------------------------------------|----|-----------|----------------------------------------------|-------------------------------------------------|----------------------------|
| Gustave Roussy | FFPE tumor block | Qiasymphony (Qiagen)* | Hybrid capture | Sureseq ovarian cancer panel (OGT)* and Oncomine BRCA (thermofisher)* | Miseq (illumina) and ionS5 (Thermofisher) | 5% | 300 | Sanger | Possible with OGT / depending on DNA quality | 15 | Home-made | HD795 mutated Standard (Horizon) in each run | Alamut, BRCA-share (UMD) and home-made database | EMQN and GenStiss programs |
|----------------|------------------|-----------------------|----------------|-----------------------------------------------------------------------|-------------------------------------------|----|-----|--------|----------------------------------------------|----|-----------|----------------------------------------------|-------------------------------------------------|----------------------------|

\* Extraction and amplification protocols were applied as described by the manufacturer

Supplementary table 2  
Germline testing

| Platform for germline testing | Samples      | DNA extraction method*    | NGS target enrichment technology | Kit*                                          | Instrument                    | Limit of detection (allelic frequency %) | Minimal coverage (X) | Confirmation of variants | LGR detection                                       | Workflow time (days) | Bioinformatic pipeline                                                             | Positive control                             | Variant annotation database                                                                                                                                                              | External quality assessment |
|-------------------------------|--------------|---------------------------|----------------------------------|-----------------------------------------------|-------------------------------|------------------------------------------|----------------------|--------------------------|-----------------------------------------------------|----------------------|------------------------------------------------------------------------------------|----------------------------------------------|------------------------------------------------------------------------------------------------------------------------------------------------------------------------------------------|-----------------------------|
| APHP                          | Blood (EDTA) | QIASymphony (Qiagen)      | Amplicon                         | BRCA MASTR Dx v2.1 (Multiplicom)              | Miseq (Illumina)              | 15%                                      | 30                   | Sanger                   | bioinformatic normalization                         | 28                   | Sequence Pilot module SeqNext (JSI medical systems)                                | Home-made mutated control in each run        | Alamut and BRCA-Share (UMD)                                                                                                                                                              | EMQN program                |
| Baclesse                      | Blood (EDTA) | Genfind (Beckman Coulter) | Hybrid capture                   | Home-made panel with Sureselect XT (Agilent)  | Nextseq500 (Illumina)         | 20%                                      | 20                   | Sanger                   | Bioinformatic normalization/ MLPA for confirmation  | 31                   | CASAVA-Nextgene                                                                    | Home-made mutated control in each run        | Alamut, BRCA-Share (UMD) and local database                                                                                                                                              | EMQN program                |
| Bergonié                      | Blood (EDTA) | Autopure (Qiagen)         | Hybrid capture                   | Home-made panel with Sureselect (Agilent)     | MiSeq - NextSeq500 (Illumina) | 10%                                      | 30                   | Sanger                   | CNV-Seq & QMPSF                                     | 19                   | For MiSeq: MiSeq Reporter v.2.4.60 & in-house pipeline For NexSeq: STARK v.0.9.13b | HD795 mutated Standard (Horizon) in each run | For MiSeq: Ensembl VEP 75 or 83 / dbSNP 138 or 144 / ESP 6500/ samtools 0.1.19 / BEDtools 2.19.1<br>For NextSeq: Annotvar/ dbSNP 138/ ESP 6500/ ESP 6500 / ExAC 03 / 1000genomes 2014oct | EMQN program                |
| Curie                         | Blood (EDTA) | Quickgene (Fujifilm)      | Hybrid capture                   | Home-made panel with Sureselect QXT (Agilent) | Nextseq500 (Illumina)         | 15%                                      | 100                  | Sanger                   | MLPA                                                | 28                   | home-made                                                                          | Home-made mutated control in each run        | BRCA-share (UMD) and local database                                                                                                                                                      | EMQN program                |
| Gustave Roussy                | Blood (EDTA) | QIASymphony (Qiagen)      | Hybrid capture                   | Home-made panel with Sureselect QXT (Agilent) | Miseq (illumina)              | 15%                                      | 100                  | Sanger                   | bioinformatic normalization / MLPA for confirmation | 15                   | Pileup base calling                                                                | Home-made mutated control in each run        | BRCA-share (UMD) and local database                                                                                                                                                      | EMQN program                |

\* Extraction and amplification protocols were applied as described by the manufacture

Supplementary table 3  
Tumor PV list

| Patient number | Sample | Gene  | Reference   | gDNA                                  | cDNA                          | Protein                    | Variant |
|----------------|--------|-------|-------------|---------------------------------------|-------------------------------|----------------------------|---------|
| E1             | tumor  | BRCA1 | NM_007294.3 | <i>g.41244010del</i>                  | <i>c.3538del</i>              | <i>p.(Ser1180Alafs*30)</i> | PV      |
| E2             | tumor  | BRCA2 | NM_000059.3 | <i>g.32913427del</i>                  | <i>c.4935del</i>              | <i>p.(Glu1646Lysfs*24)</i> | PV      |
| E3             | tumor  | BRCA1 | NM_007294.3 | <i>g.41234451G&gt;A</i>               | <i>c.4327C&gt;T</i>           | <i>p.(Arg1443*)</i>        | PV      |
| E4             | tumor  | BRCA1 | NM_007294.3 | <i>g.41228596_41228598delinsAA</i>    | <i>c.4391_4393delinsTT</i>    | <i>p.(Pro1464Leufs*2)</i>  | PV      |
| E5             | tumor  | BRCA1 | NM_007294.3 | <i>g.41244564del</i>                  | <i>c.2984del</i>              | <i>p.(Lys995Argfs*5)</i>   | PV      |
| E6             | tumor  | BRCA1 | NM_007294.3 | <i>g.41243833_41243861del</i>         | <i>c.3687_3715del</i>         | <i>p.(Leu1229Phefs*5)</i>  | PV      |
| E7             | tumor  | BRCA2 | NM_000059.3 | <i>g.32914664_32914696delinsC</i>     | <i>c.6172_6204delinsC</i>     | <i>p.(Phe2058Leufs*9)</i>  | PV      |
| E8             | tumor  | BRCA1 | NM_007294.3 | <i>g.41209080dup</i>                  | <i>c.5266dup</i>              | <i>p.(Gln1756Profs*74)</i> | PV      |
| E9             | tumor  | BRCA1 | NM_007294.3 | <i>g.41243998_41243999delinsA</i>     | <i>c.3549_3550delinsT</i>     | <i>p.(Lys1183Asnfs*27)</i> | PV      |
| E10            | tumor  | BRCA1 | NM_007294.3 | <i>g.41244528G&gt;T</i>               | <i>c.3020C&gt;A</i>           | <i>p.(Ser1007*)</i>        | PV      |
| E11            | tumor  | BRCA2 | NM_000059.3 | <i>g.32914767_32914768del</i>         | <i>c.6275_6276del</i>         | <i>p.(Leu2092Profs*7)</i>  | PV      |
| E12            | tumor  | BRCA1 | NM_007294.3 | <i>g.41243941G&gt;A</i>               | <i>c.3607C&gt;T</i>           | <i>p.(Arg1203*)</i>        | PV      |
| E13            | tumor  | BRCA1 | NM_007294.3 | <i>g.41245157del</i>                  | <i>c.2391del</i>              | <i>p.(Glu797Aspfs*6)</i>   | PV      |
| E14            | tumor  | BRCA2 | NM_000059.3 | <i>g.32912226del</i>                  | <i>c.3734del</i>              | <i>p.(Glu1245Glyfs*14)</i> | PV      |
| E15            | tumor  | BRCA1 | NM_007294.3 | <i>g.41243611G&gt;A</i>               | <i>c.3937C&gt;T</i>           | <i>p.(Gln1313*)</i>        | PV      |
| E16            | tumor  | BRCA2 | NM_000059.3 | <i>g.32914401C&gt;A</i>               | <i>c.5909C&gt;A</i>           | <i>p.(Ser1970*)</i>        | PV      |
| E17            | tumor  | BRCA1 | NM_007294.3 | <i>g.41258545C&gt;A</i>               | <i>c.140G&gt;T</i>            | <i>p.(Cys47Phe)</i>        | PV      |
| E18            | tumor  | BRCA1 | NM_007294.3 | <i>g.41243941G&gt;A</i>               | <i>c.3607C&gt;T</i>           | <i>p.(Arg1203*)</i>        | PV      |
| E19            | tumor  | BRCA1 | NM_007294.3 | <i>g.41243705_41243709delinsAGG C</i> | <i>c.3839_3843delinsAGG C</i> | <i>p.(Ser1280*)</i>        | PV      |
| E20            | tumor  | BRCA1 | NM_007294.3 | <i>g.41223147del</i>                  | <i>c.4784del</i>              | <i>p.(Ser1595Phefs*6)</i>  | PV      |
| E21            | tumor  | BRCA1 | NM_007294.3 | <i>g.41245718del</i>                  | <i>c.1830del</i>              | <i>p.(Arg610Serfs*2)</i>   | PV      |
| E22            | tumor  | BRCA1 | NM_007294.3 | <i>g.41228502delinsCA</i>             | <i>c.4484+3delinsTG</i>       | <i>p.?</i>                 | PV      |
| E23            | tumor  | BRCA2 | NM_000059.3 | <i>g.32903578A&gt;G</i>               | <i>c.632-2A&gt;G</i>          | <i>p.?</i>                 | PV      |
| E24            | tumor  | BRCA2 | NM_000059.3 | <i>g.32912872_32912873del</i>         | <i>c.4380_4381del</i>         | <i>p.(Ser1461Leufs*4)</i>  | PV      |
| E25            | tumor  | BRCA2 | NM_000059.3 | <i>g.32913711T&gt;G</i>               | <i>c.5219T&gt;G</i>           | <i>p.(Leu1740*)</i>        | PV      |
| E30            | tumor  | BRCA1 | NM_007294.3 | <i>g.41246029T&gt;A</i>               | <i>c.1519A&gt;T</i>           | <i>p.(Arg507*)</i>         | PV      |
| E31            | tumor  | BRCA2 | NM_000059.3 | <i>g.32893421_32893424dup</i>         | <i>c.275_278dup</i>           | <i>p.(Pro94Ilefs*8)</i>    | PV      |
| E32            | tumor  | BRCA1 | NM_007294.3 | <i>g.41251825del</i>                  | <i>c.514del</i>               | <i>p.(Gln172Asnfs*62)</i>  | PV      |
| E33            | tumor  | BRCA1 | NM_007294.3 | <i>g.41215963C&gt;A</i>               | <i>c.5080G&gt;T</i>           | <i>p.(Glu1694*)</i>        | PV      |
| E34            | tumor  | BRCA1 | NM_007294.3 | <i>g.41199721C&gt;T</i>               | <i>c.5407-1G&gt;A</i>         | <i>p.?</i>                 | PV      |
| E35            | tumor  | BRCA1 | NM_007294.3 | <i>g.41243844_41243848del</i>         | <i>c.3700_3704del</i>         | <i>p.(Val1234Glnfs*8)</i>  | PV      |

|     |       |       |             |                                    |                           |                            |    |
|-----|-------|-------|-------------|------------------------------------|---------------------------|----------------------------|----|
| E36 | tumor | BRCA1 | NM_007294.3 | <i>g.41245587del</i>               | <i>c.1961del</i>          | <i>p.(Lys654Serfs*47)</i>  | PV |
| E37 | tumor | BRCA2 | NM_000059.3 | <i>g.32912941del</i>               | <i>c.4449del</i>          | <i>p.(Asp1484Thrfs*2)</i>  | PV |
| E38 | tumor | BRCA1 | NM_007294.3 | <i>g.41245587del</i>               | <i>c.1961del</i>          | <i>p.(Lys654Serfs*47)</i>  | PV |
| E39 | tumor | BRCA2 | NM_000059.3 | <i>g.32914516dup</i>               | <i>c.6024dup</i>          | <i>p.(Gln2009Alafs*9)</i>  | PV |
| E40 | tumor | BRCA1 | NM_007294.3 | <i>g.41243611G&gt;A</i>            | <i>c.3937C&gt;T</i>       | <i>p.(Gln1313*)</i>        | PV |
| E41 | tumor | BRCA1 | NM_007294.3 | <i>g.41244878del</i>               | <i>c.2670del</i>          | <i>p.(Ser891Profs*2)</i>   | PV |
| E42 | tumor | BRCA2 | NM_000059.3 | <i>g.32913709_32913711delinsG</i>  | <i>c.5217_5219delinsG</i> | <i>p.(Tyr1739*)</i>        | PV |
| E44 | tumor | BRCA1 | NM_007294.3 | <i>g.41245189dup</i>               | <i>c.2359dup</i>          | <i>p.(Glu787Glyfs*3)</i>   | PV |
| E45 | tumor | BRCA2 | NM_000059.3 | <i>g.32913789dup</i>               | <i>c.5297dup</i>          | <i>p.(Asn1766Lysfs*2)</i>  | PV |
| E47 | tumor | BRCA2 | NM_000059.3 | <i>g.32971034G&gt;T</i>            | <i>c.9502-1G&gt;T</i>     | <i>p.?</i>                 | PV |
| E48 | tumor | BRCA1 | NM_007294.3 | <i>g.41245708T&gt;A</i>            | <i>c.1840A&gt;T</i>       | <i>p.(Lys614*)</i>         | PV |
| E49 | tumor | BRCA2 | NM_000059.3 | <i>g.32945142_32945143del</i>      | <i>c.8537_8538del</i>     | <i>p.(Glu2846Glyfs*22)</i> | PV |
| E50 | tumor | BRCA1 | NM_007294.3 | <i>g.41226496G&gt;C</i>            | <i>c.4527C&gt;G</i>       | <i>p.(Tyr1509*)</i>        | PV |
| E51 | tumor | BRCA2 | NM_000059.3 | <i>g.32914068_32914071del</i>      | <i>c.5576_5579del</i>     | <i>p.(Ile1859Lysfs*3)</i>  | PV |
| E52 | tumor | BRCA1 | NM_007294.3 | <i>g.41215906del</i>               | <i>c.5137del</i>          | <i>p.(Val1713*)</i>        | PV |
| E54 | tumor | BRCA1 | NM_007294.3 | <i>g.41276045_41276046del</i>      | <i>c.68_69del</i>         | <i>p.(Glu23Valfs*17)</i>   | PV |
| E55 | tumor | BRCA2 | NM_000059.3 | <i>g.32932018G&gt;A</i>            | <i>c.7757G&gt;A</i>       | <i>p.(Trp2586*)</i>        | PV |
| E56 | tumor | BRCA1 | NM_007294.3 | <i>g.41201196del</i>               | <i>c.5348del</i>          | <i>p.(Met1783Argfs*10)</i> | PV |
| E57 | tumor | BRCA2 | NM_000059.3 | <i>g.32906398T&gt;G</i>            | <i>c.794-11T&gt;G</i>     | <i>p.?</i>                 | PV |
| E58 | tumor | BRCA1 | NM_007294.3 | <i>g.41243921dup</i>               | <i>c.3627dup</i>          | <i>p.(Glu1210Argfs*9)</i>  | PV |
| E59 | tumor | BRCA1 | NM_007294.3 | <i>g.41228505C&gt;A</i>            | <i>c.4484G&gt;T</i>       | <i>p.(Ala1453Glyfs*10)</i> | PV |
| E60 | tumor | BRCA2 | NM_000059.3 | <i>g.32905145_32905149del</i>      | <i>c.771_775del</i>       | <i>p.(Asn257Lysfs*17)</i>  | PV |
| E61 | tumor | BRCA2 | NM_000059.3 | <i>g.32944692C&gt;T</i>            | <i>c.8485C&gt;T</i>       | <i>p.(Gln2829*)</i>        | PV |
| E62 | tumor | BRCA1 | NM_007294.3 | <i>g.41243730del</i>               | <i>c.3818del</i>          | <i>p.(Gln1273Argfs*2)</i>  | PV |
| E63 | tumor | BRCA1 | NM_007294.3 | <i>g.41258495A&gt;G</i>            | <i>c.190T&gt;C</i>        | <i>p.(Cys64Arg)</i>        | PV |
| E65 | tumor | BRCA2 | NM_000059.3 | <i>g.32914508_32914523dup</i>      | <i>c.6016_6031dup</i>     | <i>p.(Phe2011*)</i>        | PV |
| E66 | tumor | BRCA1 | NM_007294.3 | <i>g.41244057_41244067del</i>      | <i>c.3481_3491del</i>     | <i>p.(Glu1161Phefs*3)</i>  | PV |
| E67 | tumor | BRCA2 | NM_000059.3 | <i>g.32907212del</i>               | <i>c.1597del</i>          | <i>p.(Thr533Leufs*25)</i>  | PV |
| E68 | tumor | BRCA1 | NM_007294.3 | <i>g.41245422_41245423insT</i>     | <i>c.2125_2126insA</i>    | <i>p.(Phe709Tyrfs*3)</i>   | PV |
| E70 | tumor | BRCA1 | NM_007294.3 | <i>g.41226368dup</i>               | <i>c.4655dup</i>          | <i>p.(Tyr1552*)</i>        | PV |
| E71 | tumor | BRCA1 | NM_007294.3 | <i>g.41246277del</i>               | <i>c.1271del</i>          | <i>p.(Gly424Valfs*6)</i>   | PV |
| E72 | tumor | BRCA1 | NM_007294.3 | <i>g.41244935_41244936insA</i>     | <i>c.2612_2613insT</i>    | <i>p.(Phe872Valfs*31)</i>  | PV |
| E74 | tumor | BRCA1 | NM_007294.3 | <i>g.41246433C&gt;T</i>            | <i>c.1115G&gt;A</i>       | <i>p.(Trp372*)</i>         | PV |
| E76 | tumor | BRCA1 | NM_007294.3 | <i>g.41245392_41245423delinsCT</i> | <i>c.2126delinsAG</i>     | <i>p.(Phe709*)</i>         | PV |

|      |       |       |             |                                 |                         |                            |    |
|------|-------|-------|-------------|---------------------------------|-------------------------|----------------------------|----|
| E77  | tumor | BRCA1 | NM_007294.3 | <i>g.41246572C&gt;A</i>         | <i>c.976G&gt;T</i>      | <i>p.(Glu326*)</i>         | PV |
| E78  | tumor | BRCA2 | NM_000059.3 | <i>g.32913492C&gt;G</i>         | <i>c.5000C&gt;G</i>     | <i>p.(Ser1667*)</i>        | PV |
| E79  | tumor | BRCA1 | NM_007294.3 | <i>g.41209068C&gt;T</i>         | <i>c.5277+1G&gt;A</i>   | <i>p.?</i>                 | PV |
| E80  | tumor | BRCA1 | NM_007294.3 | <i>g.41203111A&gt;T</i>         | <i>c.5301T&gt;A</i>     | <i>p.(Cys1767*)</i>        | PV |
| E81  | tumor | BRCA1 | NM_007294.3 | <i>g.41244621del</i>            | <i>c.2927del</i>        | <i>p.(Asn976Thrfs*24)</i>  | PV |
| E82  | tumor | BRCA2 | NM_000059.3 | <i>g.32912890_32912894del</i>   | <i>c.4398_4402del</i>   | <i>p.(Leu1466Phefs*2)</i>  | PV |
| E84  | tumor | BRCA1 | NM_007294.3 | <i>g.41243611G&gt;A</i>         | <i>c.3937C&gt;T</i>     | <i>p.(Gln1313*)</i>        | PV |
| E85  | tumor | BRCA2 | NM_000059.3 | <i>g.32915136_32915139del</i>   | <i>c.6644_6647del</i>   | <i>p.(Tyr2215Serfs*13)</i> | PV |
| E86  | tumor | BRCA2 | NM_000059.3 | <i>g.32912091_32912092del</i>   | <i>c.3599_3600del</i>   | <i>p.(Cys1200*)</i>        | PV |
| E87  | tumor | BRCA1 | NM_007294.3 | <i>g.41243557G&gt;A</i>         | <i>c.3991C&gt;T</i>     | <i>p.(Gln1331*)</i>        | PV |
| E88  | tumor | BRCA1 | NM_007294.3 | <i>g.41258494C&gt;T</i>         | <i>c.191G&gt;A</i>      | <i>p.(Cys64Tyr)</i>        | PV |
| E90  | tumor | BRCA2 | NM_000059.3 | <i>g.32911943_32911944insGA</i> | <i>c.3451_3452insGA</i> | <i>p.(Ile1151Argfs*3)</i>  | PV |
| E91  | tumor | BRCA1 | NM_007294.3 | <i>g.41243614_41243617del</i>   | <i>c.3931_3934del</i>   | <i>p.(Asn1311Profs*6)</i>  | PV |
| E92  | tumor | BRCA1 | NM_007294.3 | <i>g.41209139A&gt;G</i>         | <i>c.5207T&gt;C</i>     | <i>p.(Val1736Ala)</i>      | PV |
| E93  | tumor | BRCA1 | NM_007294.3 | <i>g.41251782_41251807del</i>   | <i>c.532_547+10del</i>  | <i>p.(Val178Aspfs*51)</i>  | PV |
| E94  | tumor | BRCA1 | NM_007294.3 | <i>g.41244936delinsAA</i>       | <i>c.2612delinsTT</i>   | <i>p.(Pro871Leufs*32)</i>  | PV |
| E95  | tumor | BRCA1 | NM_007294.3 | <i>g.41219666_41219669del</i>   | <i>c.5030_5033del</i>   | <i>p.(Thr1677Ilefs*2)</i>  | PV |
| E96  | tumor | BRCA2 | NM_000059.3 | <i>g.32900642C&gt;T</i>         | <i>c.523C&gt;T</i>      | <i>p.(Gln175*)</i>         | PV |
| E96  | tumor | BRCA2 | NM_000059.3 | <i>g.32903583_32903584del</i>   | <i>c.635_636del</i>     | <i>p.(Arg212Lysfs*2)</i>   | PV |
| E97  | tumor | BRCA2 | NM_000059.3 | <i>g.32915335T&gt;G</i>         | <i>c.6841+2T&gt;G</i>   | <i>p.?</i>                 | PV |
| E97  | tumor | BRCA2 | NM_000059.3 | <i>g.32913457C&gt;A</i>         | <i>c.4965C&gt;A</i>     | <i>p.(Tyr1655*)</i>        | PV |
| E98  | tumor | BRCA1 | NM_007294.3 | <i>g.41245656dup</i>            | <i>c.1892dup</i>        | <i>p.(Ser632Lysfs*4)</i>   | PV |
| E99  | tumor | BRCA1 | NM_007294.3 | <i>g.41209080dup</i>            | <i>c.5266dup</i>        | <i>p.(Gln1756Profs*74)</i> | PV |
| E100 | tumor | BRCA1 | NM_007294.3 | <i>g.41197784G&gt;A</i>         | <i>c.5503C&gt;T</i>     | <i>p.(Arg1835*)</i>        | PV |
| E101 | tumor | BRCA1 | NM_007294.3 | <i>g.41245874del</i>            | <i>c.1674del</i>        | <i>p.(Gly559Valfs*13)</i>  | PV |
| E104 | tumor | BRCA1 | NM_007294.3 | <i>g.41251816T&gt;A</i>         | <i>c.523A&gt;T</i>      | <i>p.(Lys175*)</i>         | PV |
| E106 | tumor | BRCA2 | NM_000059.3 | <i>g.32914174C&gt;G</i>         | <i>c.5682C&gt;G</i>     | <i>p.(Tyr1894*)</i>        | PV |
| E108 | tumor | BRCA2 | NM_000059.3 | <i>g.32915083_32915084del</i>   | <i>c.6591_6592del</i>   | <i>p.(Glu2198Asnfs*4)</i>  | PV |
| E109 | tumor | BRCA2 | NM_000059.3 | <i>g.32911727dup</i>            | <i>c.3235dup</i>        | <i>p.(Ser1079Phefs*2)</i>  | PV |
| E111 | tumor | BRCA1 | NM_007294.3 | <i>g.41209080dup</i>            | <i>c.5266dup</i>        | <i>p.(Gln1756Profs*74)</i> | PV |
| E114 | tumor | BRCA1 | NM_007294.3 | <i>g.41244739_41244742del</i>   | <i>c.2806_2809del</i>   | <i>p.(Asp936Serfs*63)</i>  | PV |
| E116 | tumor | BRCA1 | NM_007294.3 | <i>g.41215920G&gt;T</i>         | <i>c.5123C&gt;A</i>     | <i>p.(Ala1708Glu)</i>      | PV |
| E118 | tumor | BRCA2 | NM_000059.3 | <i>g.32929170A&gt;T</i>         | <i>c.7180A&gt;T</i>     | <i>p.(Arg2394*)</i>        | PV |
| E120 | tumor | BRCA1 | NM_007294.3 | <i>g.41199672_41199673dup</i>   | <i>c.5454_5455dup</i>   | <i>p.(Asn1819Thrfs*16)</i> | PV |

|      |       |       |             |                                   |                       |                            |    |
|------|-------|-------|-------------|-----------------------------------|-----------------------|----------------------------|----|
| E122 | tumor | BRCA1 | NM_007294.3 | <i>g.41245529del</i>              | <i>c.2019del</i>      | <i>p.(Glu673Aspfs*28)</i>  | PV |
| E123 | tumor | BRCA2 | NM_000059.3 | <i>g.32914137C&gt;A</i>           | <i>c.5645C&gt;A</i>   | <i>p.(Ser1882*)</i>        | PV |
| E124 | tumor | BRCA1 | NM_007294.3 | <i>g.41243789_41243792del</i>     | <i>c.3756_3759del</i> | <i>p.(Ser1253Argfs*10)</i> | PV |
| E125 | tumor | BRCA1 | NM_007294.3 | <i>g.41246749_41246750del</i>     | <i>c.798_799del</i>   | <i>p.(Ser267Lysfs*19)</i>  | PV |
| E126 | tumor | BRCA2 | NM_000059.3 | <i>g.32911526_32911529del</i>     | <i>c.3034_3037del</i> | <i>p.(Ala1012Glnfs*30)</i> | PV |
| E129 | tumor | BRCA2 | NM_000059.3 | <i>g.32914438del</i>              | <i>c.5946del</i>      | <i>p.(Ser1982Argfs*22)</i> | PV |
| E131 | tumor | BRCA2 | NM_000059.3 | <i>g.32911530C&gt;A</i>           | <i>c.3038C&gt;A</i>   | <i>p.(Ser1013*)</i>        | PV |
| E133 | tumor | BRCA1 | NM_007294.3 | <i>g.41276048_41276049delinsC</i> | <i>c.65_66delinsG</i> | <i>p.(Leu22Trpfs*9)</i>    | PV |
| E134 | tumor | BRCA1 | NM_007294.3 | <i>g.41267745G&gt;C</i>           | <i>c.132C&gt;G</i>    | <i>p.(Cys44Trp)</i>        | PV |
| E135 | tumor | BRCA1 | NM_007294.3 | <i>g.41267753del</i>              | <i>c.124del</i>       | <i>p.(Ile42Tyrfs*8)</i>    | PV |
| E137 | tumor | BRCA2 | NM_000059.3 | <i>g.32914701_32914704del</i>     | <i>c.6209_6212del</i> | <i>p.(Glu2070Valfs*10)</i> | PV |
| E138 | tumor | BRCA1 | NM_007294.3 | <i>g.41246155del</i>              | <i>c.1393del</i>      | <i>p.(Tyr465Ilefs*10)</i>  | PV |
| E139 | tumor | BRCA2 | NM_000059.3 | <i>g.32929055_32929058del</i>     | <i>c.7065_7068del</i> | <i>p.(Glu2355Aspfs*11)</i> | PV |
| E140 | tumor | BRCA1 | NM_007294.3 | <i>g.41215920G&gt;T</i>           | <i>c.5123C&gt;A</i>   | <i>p.(Ala1708Glu)</i>      | PV |
| E141 | tumor | BRCA2 | NM_000059.3 | <i>g.32914438del</i>              | <i>c.5946del</i>      | <i>p.(Ser1982Argfs*22)</i> | PV |
| E142 | tumor | BRCA1 | NM_007294.3 | <i>g.41243611G&gt;A</i>           | <i>c.3937C&gt;T</i>   | <i>p.(Gln1313*)</i>        | PV |
| E143 | tumor | BRCA2 | NM_000059.3 | <i>g.32931941dup</i>              | <i>c.7680dup</i>      | <i>p.(Gln2561Serfs*5)</i>  | PV |
| E144 | tumor | BRCA1 | NM_007294.3 | <i>g.41243943dup</i>              | <i>c.3605dup</i>      | <i>p.(Tyr1202*)</i>        | PV |
| E146 | tumor | BRCA1 | NM_007294.3 | <i>g.41245287del</i>              | <i>c.2269del</i>      | <i>p.(Val757Phefs*8)</i>   | PV |
| E147 | tumor | BRCA2 | NM_000059.3 | <i>g.32914438del</i>              | <i>c.5946del</i>      | <i>p.(Ser1982Argfs*22)</i> | PV |
| E148 | tumor | BRCA1 | NM_007294.3 | <i>g.41223063G&gt;C</i>           | <i>c.4868C&gt;G</i>   | <i>p.(Ala1623Gly)</i>      | PV |
| E149 | tumor | BRCA1 | NM_007294.3 | <i>g.41251819G&gt;A</i>           | <i>c.520C&gt;T</i>    | <i>p.(Gln174*)</i>         | PV |
| E150 | tumor | BRCA2 | NM_000059.3 | <i>g.32913705_32913708del</i>     | <i>c.5213_5216del</i> | <i>p.(Thr1738Ilefs*2)</i>  | PV |
| E151 | tumor | BRCA2 | NM_000059.3 | <i>g.32913565dup</i>              | <i>c.5073dup</i>      | <i>p.(Trp1692Metfs*3)</i>  | PV |
| E152 | tumor | BRCA2 | NM_000059.3 | <i>g.32911300_32911303del</i>     | <i>c.2808_2811del</i> | <i>p.(Ala938Profs*21)</i>  | PV |
| E152 | tumor | BRCA1 | NM_007294.3 | <i>g.41243921dup</i>              | <i>c.3627dup</i>      | <i>p.(Glu1210Argfs*9)</i>  | PV |
| E154 | tumor | BRCA1 | NM_007294.3 | <i>g.41245279del</i>              | <i>c.2269del</i>      | <i>p.(Val757Phefs*8)</i>   | PV |
| E155 | tumor | BRCA1 | NM_007294.3 | <i>g.41245033del</i>              | <i>c.2515del</i>      | <i>p.(His839Thrfs*7)</i>   | PV |
| E156 | tumor | BRCA1 | NM_007294.3 | <i>g.41251790A&gt;T</i>           | <i>c.547+2T&gt;A</i>  | <i>p.?</i>                 | PV |
| E157 | tumor | BRCA1 | NM_007294.3 | <i>g.41215906del</i>              | <i>c.5137del</i>      | <i>p.(Val1713*)</i>        | PV |
| E158 | tumor | BRCA1 | NM_007294.3 | <i>g.41226450G&gt;A</i>           | <i>c.4573C&gt;T</i>   | <i>p.(Gln1525*)</i>        | PV |
| E160 | tumor | BRCA1 | NM_007294.3 | <i>g.41246532del</i>              | <i>c.1016del</i>      | <i>p.(Lys339Argfs*2)</i>   | PV |
| E161 | tumor | BRCA2 | NM_000059.3 | <i>g.32914724G&gt;T</i>           | <i>c.6232G&gt;T</i>   | <i>p.(Gly2078*)</i>        | PV |
| E162 | tumor | BRCA2 | NM_000059.3 | <i>g.32914343_32914346del</i>     | <i>c.5851_5854del</i> | <i>p.(Ser1951Trpfs*11)</i> | PV |

|      |       |       |                 |                                   |                           |                            |    |
|------|-------|-------|-----------------|-----------------------------------|---------------------------|----------------------------|----|
| E163 | tumor | BRCA1 | NM_007294.<br>3 | <i>g.41244826C&gt;A</i>           | <i>c.2722G&gt;T</i>       | <i>p.(Glu908*)</i>         | PV |
| E164 | tumor | BRCA2 | NM_000059.<br>3 | <i>g.32920978C&gt;T</i>           | <i>c.6952C&gt;T</i>       | <i>p.(Arg2318*)</i>        | PV |
| E165 | tumor | BRCA1 | NM_007294.<br>3 | <i>g.41246733dup</i>              | <i>c.815dup</i>           | <i>p.(Pro273Alafs*14)</i>  | PV |
| E166 | tumor | BRCA1 | NM_007294.<br>3 | <i>g.41246394C&gt;T</i>           | <i>c.1154G&gt;A</i>       | <i>p.(Trp385*)</i>         | PV |
| E167 | tumor | BRCA2 | NM_000059.<br>3 | <i>g.32914899T&gt;G</i>           | <i>c.6407T&gt;G</i>       | <i>p.(Leu2136*)</i>        | PV |
| E169 | tumor | BRCA1 | NM_007294.<br>3 | <i>g.41251845dup</i>              | <i>c.494dup</i>           | <i>p.(Arg166Glufs*16)</i>  | PV |
| E170 | tumor | BRCA1 | NM_007294.<br>3 | <i>g.41243744_41243745del</i>     | <i>c.3803_3804del</i>     | <i>p.(Asn1268Argfs*4)</i>  | PV |
| E171 | tumor | BRCA1 | NM_007294.<br>3 | <i>g.41219651_41219655delinsA</i> | <i>c.5044_5048delinsT</i> | <i>p.Glu1682*</i>          | PV |
| E173 | tumor | BRCA1 | NM_007294.<br>3 | <i>g.41246039_41246051del</i>     | <i>c.1497_1509del</i>     | <i>p.(Asn500Valfs*28)</i>  | PV |
| E175 | tumor | BRCA1 | NM_007294.<br>3 | <i>g.41219666_41219669del</i>     | <i>c.5030_5033del</i>     | <i>p.(Thr1677Ilefs*2)</i>  | PV |
| E176 | tumor | BRCA2 | NM_000059.<br>3 | <i>g.32914438del</i>              | <i>c.5946del</i>          | <i>p.(Ser1982Argfs*22)</i> | PV |
| E177 | tumor | BRCA1 | NM_007294.<br>3 | <i>g.41201191G&gt;A</i>           | <i>c.5353C&gt;T</i>       | <i>p.(Gln1785*)</i>        | PV |
| E178 | tumor | BRCA2 | NM_000059.<br>3 | <i>g.32953951C&gt;A</i>           | <i>c.9018C&gt;A</i>       | <i>p.(Tyr3006*)</i>        | PV |
| E179 | tumor | BRCA2 | NM_000059.<br>3 | <i>g.32929099_32929100del</i>     | <i>c.7109_7110del</i>     | <i>p.(Lys2370Ilefs*21)</i> | PV |
| E181 | tumor | BRCA1 | NM_007294.<br>3 | <i>g.41244627A&gt;T</i>           | <i>c.2921T&gt;A</i>       | <i>p.(Leu974*)</i>         | PV |
| E182 | tumor | BRCA1 | NM_007294.<br>3 | <i>g.41267788A&gt;T</i>           | <i>c.89T&gt;A</i>         | <i>p.(Leu30*)</i>          | PV |
| E183 | tumor | BRCA2 | NM_000059.<br>3 | <i>g.32913428_32913431del</i>     | <i>c.4936_4939del</i>     | <i>p.(Glu1646Glnfs*23)</i> | PV |
| E184 | tumor | BRCA2 | NM_000059.<br>3 | <i>g.32893376del</i>              | <i>c.230del</i>           | <i>p.(Thr77Ilefs*3)</i>    | PV |
| E185 | tumor | BRCA2 | NM_000059.<br>3 | <i>g.32920985T&gt;A</i>           | <i>c.6959T&gt;A</i>       | <i>p.(Leu2320*)</i>        | PV |
| E186 | tumor | BRCA1 | NM_007294.<br>3 | <i>g.41244057_41244067del</i>     | <i>c.3481_3491del</i>     | <i>p.(Glu1161Phefs*3)</i>  | PV |
| E187 | tumor | BRCA1 | NM_007294.<br>3 | <i>g.41258507G&gt;A</i>           | <i>c.178C&gt;T</i>        | <i>p.(Gln60*)</i>          | PV |
| E188 | tumor | BRCA1 | NM_007294.<br>3 | <i>g.41267769_41267770insCA</i>   | <i>c.107_108insTG</i>     | <i>p.(Thr37Alafs*14)</i>   | PV |
| E190 | tumor | BRCA1 | NM_007294.<br>3 | <i>g.41215920G&gt;T</i>           | <i>c.5123C&gt;A</i>       | <i>p.(Ala1708Glu)</i>      | PV |
| E191 | tumor | BRCA2 | NM_000059.<br>3 | <i>g.32914800C&gt;G</i>           | <i>c.6308C&gt;G</i>       | <i>p.(Ser2103*)</i>        | PV |
| E193 | tumor | BRCA1 | NM_007294.<br>3 | <i>g.41244291A&gt;C</i>           | <i>c.3257T&gt;G</i>       | <i>p.(Leu1086*)</i>        | PV |
| E194 | tumor | BRCA1 | NM_007294.<br>3 | <i>g.41244214_41244217del</i>     | <i>c.3331_3334del</i>     | <i>p.(Gln1111Asnfs*5)</i>  | PV |
| E195 | tumor | BRCA1 | NM_007294.<br>3 | <i>g.41267798T&gt;A</i>           | <i>c.81-2A&gt;T</i>       | <i>p.?</i>                 | PV |
| E196 | tumor | BRCA1 | NM_007294.<br>3 | <i>g.41215948G&gt;A</i>           | <i>c.5095C&gt;T</i>       | <i>p.(Arg1699Trp)</i>      | PV |
| E198 | tumor | BRCA2 | NM_000059.<br>3 | <i>g.32914960_32914961del</i>     | <i>c.6468_6469del</i>     | <i>p.(Gln2157Ilefs*18)</i> | PV |
| E199 | tumor | BRCA1 | NM_007294.<br>3 | <i>g.41276045_41276046del</i>     | <i>c.68_69del</i>         | <i>p.(Glu23Valfs*17)</i>   | PV |
| E200 | tumor | BRCA2 | NM_000059.<br>3 | <i>g.32953886G&gt;T</i>           | <i>c.8954-1G&gt;T</i>     | <i>p.?</i>                 | PV |
| E201 | tumor | BRCA1 | NM_007294.<br>3 | <i>g.41244214_41244217del</i>     | <i>c.3331_3334del</i>     | <i>p.(Gln1111Asnfs*5)</i>  | PV |
| E202 | tumor | BRCA1 | NM_007294.<br>3 | <i>g.41256223del</i>              | <i>c.357del</i>           | <i>p.(Asp120Metfs*43)</i>  | PV |
| E203 | tumor | BRCA2 | NM_000059.<br>3 | <i>g.32911300_32911303del</i>     | <i>c.2808_2811del</i>     | <i>p.(Ala938Profs*21)</i>  | PV |



|      |       |       |             |                               |                       |                            |    |
|------|-------|-------|-------------|-------------------------------|-----------------------|----------------------------|----|
| E205 | tumor | BRCA1 | NM_007294.3 | <i>g.41243789_41243792del</i> | <i>c.3756_3759del</i> | <i>p.(Ser1253Argfs*10)</i> | PV |
| E209 | tumor | BRCA1 | NM_007294.3 | <i>g.41244319_41244320del</i> | <i>c.3228_3229del</i> | <i>p.(Gly1077Alafs*8)</i>  | PV |
| E210 | tumor | BRCA1 | NM_007294.3 | <i>g.41209080dup</i>          | <i>c.5266dup</i>      | <i>p.(Gln1756Profs*74)</i> | PV |
| E211 | tumor | BRCA1 | NM_007294.3 | <i>g.41201184del</i>          | <i>c.5360del</i>      | <i>p.(Cys1787Leufs*6)</i>  | PV |
| E212 | tumor | BRCA1 | NM_007294.3 | <i>g.41243789_41243792del</i> | <i>c.3756_3759del</i> | <i>p.(Ser1253Argfs*10)</i> | PV |
| E213 | tumor | BRCA1 | NM_007294.3 | <i>g.41209080dup</i>          | <i>c.5266dup</i>      | <i>p.(Gln1756Profs*74)</i> | PV |
| E214 | tumor | BRCA2 | NM_000059.3 | <i>g.32914529A&gt;T</i>       | <i>c.6037A&gt;T</i>   | <i>p.(Lys2013*)</i>        | PV |
| E215 | tumor | BRCA2 | NM_000059.3 | <i>g.32914288_32914289del</i> | <i>c.5796_5797del</i> | <i>p.(His1932Glnfs*12)</i> | PV |
| E216 | tumor | BRCA1 | NM_007294.3 | <i>g.41215958_41215959del</i> | <i>c.5084_5085del</i> | <i>p.(Phe1695Cysfs*3)</i>  | PV |
| E218 | tumor | BRCA1 | NM_007294.3 | <i>g.41244319_41244320del</i> | <i>c.3228_3229del</i> | <i>p.(Gly1077Alafs*8)</i>  | PV |
| E219 | tumor | BRCA2 | NM_000059.3 | <i>g.32953577C&gt;T</i>       | <i>c.8878C&gt;T</i>   | <i>p.(Gln2960*)</i>        | PV |
| E220 | tumor | BRCA1 | NM_007294.3 | <i>g.41244588dup</i>          | <i>c.2960dup</i>      | <i>p.(Ser988Valfs*4)</i>   | PV |
| E222 | tumor | BRCA2 | NM_000059.3 | <i>g.32914960_32914961del</i> | <i>c.6468_6469del</i> | <i>p.(Gln2157Ilefs*18)</i> | PV |
| E223 | tumor | BRCA1 | NM_007294.3 | <i>g.41234451G&gt;A</i>       | <i>c.4327C&gt;T</i>   | <i>p.(Arg1443*)</i>        | PV |
| E224 | tumor | BRCA2 | NM_000059.3 | <i>g.32914934del</i>          | <i>c.6442del</i>      | <i>p.(Ser2148Leufs*20)</i> | PV |
| E225 | tumor | BRCA1 | NM_007294.3 | <i>g.41246168dup</i>          | <i>c.1380dup</i>      | <i>p.(Phe461Ilefs*19)</i>  | PV |
| E226 | tumor | BRCA2 | NM_000059.3 | <i>g.32950847_32950848del</i> | <i>c.8673_8674del</i> | <i>p.(Arg2892Thrfs*14)</i> | PV |
| E227 | tumor | BRCA1 | NM_007294.3 | <i>g.41256279C&gt;A</i>       | <i>c.302-1G&gt;T</i>  | <i>p.?</i>                 | PV |
| E232 | tumor | BRCA1 | NM_007294.3 | <i>g.41245587del</i>          | <i>c.1961del</i>      | <i>p.(Lys654Serfs*47)</i>  | PV |
| E233 | tumor | BRCA1 | NM_007294.3 | <i>g.41209080dup</i>          | <i>c.5266dup</i>      | <i>p.(Gln1756Profs*74)</i> | PV |
| E234 | tumor | BRCA1 | NM_007294.3 | <i>g.41245861G&gt;A</i>       | <i>c.1687C&gt;T</i>   | <i>p.(Gln563*)</i>         | PV |
| E235 | tumor | BRCA1 | NM_007294.3 | <i>g.41226444C&gt;A</i>       | <i>c.4579G&gt;T</i>   | <i>p.(Glu1527*)</i>        | PV |
| E236 | tumor | BRCA1 | NM_007294.3 | <i>g.41246551_41246570del</i> | <i>c.978_997del</i>   | <i>p.(Glu326Aspfs*13)</i>  | PV |
| E236 | tumor | BRCA1 | NM_007294.3 | <i>g.41246481del</i>          | <i>c.1067del</i>      | <i>p.(Gln356Argfs*18)</i>  | PV |
| E237 | tumor | BRCA1 | NM_007294.3 | <i>g.41245632A&gt;T</i>       | <i>c.1916T&gt;A</i>   | <i>p.(Leu639*)</i>         | PV |
| E238 | tumor | BRCA1 | NM_007294.3 | <i>g.41219666_41219669del</i> | <i>c.5030_5033del</i> | <i>p.(Thr1677Ilefs*2)</i>  | PV |
| E239 | tumor | BRCA1 | NM_007294.3 | <i>g.41201154G&gt;C</i>       | <i>c.5390C&gt;G</i>   | <i>p.(Ser1797*)</i>        | PV |
| E240 | tumor | BRCA1 | NM_007294.3 | <i>g.41209095G&gt;A</i>       | <i>c.5251C&gt;T</i>   | <i>p.(Arg1751*)</i>        | PV |
| E241 | tumor | BRCA1 | NM_007294.3 | <i>g.41243578del</i>          | <i>c.3970del</i>      | <i>p.(Met1324*)</i>        | PV |
| E242 | tumor | BRCA1 | NM_007294.3 | <i>g.41258504A&gt;C</i>       | <i>c.181T&gt;G</i>    | <i>p.(Cys61Gly)</i>        | PV |
| E244 | tumor | BRCA2 | NM_000059.3 | <i>g.32914137C&gt;A</i>       | <i>c.5645C&gt;A</i>   | <i>p.(Ser1882*)</i>        | PV |
| E245 | tumor | BRCA2 | NM_000059.3 | <i>g.32913565dup</i>          | <i>c.5073dup</i>      | <i>p.(Trp1692Metfs*3)</i>  | PV |
| E246 | tumor | BRCA1 | NM_007294.3 | <i>g.41243844_41243848del</i> | <i>c.3700_3704del</i> | <i>p.(Val1234Glnfs*8)</i>  | PV |
| E247 | tumor | BRCA2 | NM_000059.3 | <i>g.32954050G&gt;A</i>       | <i>c.9117G&gt;A</i>   | <i>p.(Pro3039=)</i>        | PV |

|      |       |       |             |                                   |                           |                            |    |
|------|-------|-------|-------------|-----------------------------------|---------------------------|----------------------------|----|
| E248 | tumor | BRCA1 | NM_007294.3 | <i>g.41246702_41246705del</i>     | <i>c.843_846del</i>       | <i>p.(Ser282Tyrfs*15)</i>  | PV |
| E250 | tumor | BRCA1 | NM_007294.3 | <i>g.41245861G&gt;A</i>           | <i>c.1687C&gt;T</i>       | <i>p.(Gln563*)</i>         | PV |
| E251 | tumor | BRCA2 | NM_000059.3 | <i>g.32912339_32912340del</i>     | <i>c.3847_3848del</i>     | <i>p.(Val1283Lysfs*2)</i>  | PV |
| E252 | tumor | BRCA1 | NM_007294.3 | <i>g.41209080dup</i>              | <i>c.5266dup</i>          | <i>p.(Gln1756Profs*74)</i> | PV |
| E253 | tumor | BRCA1 | NM_007294.3 | NA                                | NA                        | exon 13-15 duplication     | PV |
| E254 | tumor | BRCA1 | NM_007294.3 | <i>g.41246702_41246705del</i>     | <i>c.843_846del</i>       | <i>p.(Ser282Tyrfs*15)</i>  | PV |
| E255 | tumor | BRCA1 | NM_007294.3 | <i>g.41223242G&gt;C</i>           | <i>c.4689C&gt;G</i>       | <i>p.(Tyr1563*)</i>        | PV |
| E257 | tumor | BRCA1 | NM_007294.3 | <i>g.41209080dup</i>              | <i>c.5266dup</i>          | <i>p.(Gln1756Profs*74)</i> | PV |
| E258 | tumor | BRCA1 | NM_007294.3 | <i>g.41226348C&gt;T</i>           | <i>c.4675G&gt;A</i>       | <i>p.(Glu1559Lys)</i>      | PV |
| E259 | tumor | BRCA1 | NM_007294.3 | <i>g.41209080dup</i>              | <i>c.5266dup</i>          | <i>p.(Gln1756Profs*74)</i> | PV |
| E260 | tumor | BRCA1 | NM_007294.3 | <i>g.41209080dup</i>              | <i>c.5266dup</i>          | <i>p.(Gln1756Profs*74)</i> | PV |
| E262 | tumor | BRCA1 | NM_007294.3 | <i>g.41209080dup</i>              | <i>c.5266dup</i>          | <i>p.(Gln1756Profs*74)</i> | PV |
| E263 | tumor | BRCA1 | NM_007294.3 | <i>g.41246040_41246044del</i>     | <i>c.1504_1508del</i>     | <i>p.(Leu502Alafs*2)</i>   | PV |
| E265 | tumor | BRCA1 | NM_007294.3 | <i>g.41242963G&gt;A</i>           | <i>c.4183C&gt;T</i>       | <i>p.(Gln1395*)</i>        | PV |
| E266 | tumor | BRCA1 | NM_007294.3 | <i>g.41209080dup</i>              | <i>c.5266dup</i>          | <i>p.(Gln1756Profs*74)</i> | PV |
| E267 | tumor | BRCA1 | NM_007294.3 | <i>g.41245152del</i>              | <i>c.2396del</i>          | <i>p.(Asn799Ilefs*4)</i>   | PV |
| E268 | tumor | BRCA2 | NM_000059.3 | <i>g.32913842_32913843del</i>     | <i>c.5350_5351del</i>     | <i>p.(Asn1784Hisfs*2)</i>  | PV |
| E269 | tumor | BRCA1 | NM_007294.3 | <i>g.41215920G&gt;A</i>           | <i>c.5123C&gt;T</i>       | <i>p.(Ala1708Val)</i>      | PV |
| E271 | tumor | BRCA2 | NM_000059.3 | <i>g.32907114del</i>              | <i>c.1499del</i>          | <i>p.(Gly500Valfs*9)</i>   | PV |
| E272 | tumor | BRCA1 | NM_007294.3 | <i>g.41223175C&gt;A</i>           | <i>c.4756G&gt;T</i>       | <i>p.(Glu1586*)</i>        | PV |
| E273 | tumor | BRCA1 | NM_007294.3 | <i>g.41215392del</i>              | <i>c.5153-2del</i>        | <i>p.?</i>                 | PV |
| E274 | tumor | BRCA1 | NM_007294.3 | <i>g.41215963C&gt;A</i>           | <i>c.5080G&gt;T</i>       | <i>p.(Glu1694*)</i>        | PV |
| E275 | tumor | BRCA2 | NM_000059.3 | <i>g.32914137C&gt;A</i>           | <i>c.5645C&gt;A</i>       | <i>p.(Ser1882*)</i>        | PV |
| E276 | tumor | BRCA1 | NM_007294.3 | <i>g.41222942C&gt;G</i>           | <i>c.4986+3G&gt;C</i>     | <i>p.?</i>                 | PV |
| E277 | tumor | BRCA1 | NM_007294.3 | <i>g.41201212C&gt;G</i>           | <i>c.5333-1G&gt;C</i>     | <i>p.?</i>                 | PV |
| E278 | tumor | BRCA1 | NM_007294.3 | <i>g.41258494C&gt;T</i>           | <i>c.191G&gt;A</i>        | <i>p.(Cys64Tyr)</i>        | PV |
| E280 | tumor | BRCA2 | NM_000059.3 | <i>g.32914800C&gt;A</i>           | <i>c.6308C&gt;A</i>       | <i>p.(Ser2103*)</i>        | PV |
| E282 | tumor | BRCA1 | NM_007294.3 | <i>g.41245784del</i>              | <i>c.1764del</i>          | <i>p.(Ser588Argfs*4)</i>   | PV |
| E283 | tumor | BRCA2 | NM_000059.3 | <i>g.32914513del</i>              | <i>c.6021del</i>          | <i>p.(Lys2008Serfs*32)</i> | PV |
| E284 | tumor | BRCA1 | NM_007294.3 | <i>g.41243467_41243468delinsA</i> | <i>c.4080_4081delinsT</i> | <i>p.(Met1361Trpfs*5)</i>  | PV |
| E286 | tumor | BRCA2 | NM_000059.3 | <i>g.32907428dup</i>              | <i>c.1813dup</i>          | <i>p.(Ile605Asnfs*11)</i>  | PV |
| E287 | tumor | BRCA1 | NM_007294.3 | <i>g.41243779C&gt;A</i>           | <i>c.3769G&gt;T</i>       | <i>p.(Glu1257*)</i>        | PV |
| E288 | tumor | BRCA1 | NM_007294.3 | <i>g.41243480_41243483del</i>     | <i>c.4065_4068del</i>     | <i>p.(Asn1355Lysfs*10)</i> | PV |
| E289 | tumor | BRCA2 | NM_000059.3 | <i>g.32937582G&gt;T</i>           | <i>c.8243G&gt;T</i>       | <i>p.(Gly2748Val)</i>      | PV |

|      |       |       |             |                               |                       |                            |    |
|------|-------|-------|-------------|-------------------------------|-----------------------|----------------------------|----|
| E290 | tumor | BRCA2 | NM_000059.3 | <i>g.32913795_32913796del</i> | <i>c.5303_5304del</i> | <i>p.(Leu1768Argfs*5)</i>  | PV |
| E291 | tumor | BRCA2 | NM_000059.3 | <i>g.32913842_32913843del</i> | <i>c.5350_5351del</i> | <i>p.(Asn1784Hisfs*2)</i>  | PV |
| E293 | tumor | BRCA2 | NM_000059.3 | NA                            | <i>c.9257-1del</i>    | <i>p.?</i>                 | PV |
| E294 | tumor | BRCA1 | NM_007294.3 | <i>g.41197784G&gt;A</i>       | <i>c.5503C&gt;T</i>   | <i>p.(Arg1835*)</i>        | PV |
| E295 | tumor | BRCA1 | NM_007294.3 | <i>g.41258504A&gt;C</i>       | <i>c.181T&gt;G</i>    | <i>p.(Cys61Gly)</i>        | PV |
| E296 | tumor | BRCA1 | NM_007294.3 | <i>g.41245632A&gt;T</i>       | <i>c.1916T&gt;A</i>   | <i>p.(Leu639*)</i>         | PV |
| E298 | tumor | BRCA2 | NM_000059.3 | <i>g.32913730dup</i>          | <i>c.5238dup</i>      | <i>p.(Asn1747*)</i>        | PV |
| E299 | tumor | BRCA2 | NM_000059.3 | <i>g.32913730dup</i>          | <i>c.5238dup</i>      | <i>p.(Asn1747*)</i>        | PV |
| E300 | tumor | BRCA2 | NM_000059.3 | <i>g.32911691del</i>          | <i>c.3199del</i>      | <i>p.(Thr1067Leufs*10)</i> | PV |
| E301 | tumor | BRCA1 | NM_007294.3 | <i>g.41243844_41243848del</i> | <i>c.3700_3704del</i> | <i>p.(Val1234Glnfs*8)</i>  | PV |
| E302 | tumor | BRCA2 | NM_000059.3 | <i>g.32914438del</i>          | <i>c.5946del</i>      | <i>p.(Ser1982Argfs*22)</i> | PV |
| E305 | tumor | BRCA1 | NM_007294.3 | <i>g.41243513del</i>          | <i>c.4035del</i>      | <i>p.(Glu1346Lysfs*20)</i> | PV |
| E306 | tumor | BRCA2 | NM_000059.3 | <i>g.32954039C&gt;T</i>       | <i>c.9106C&gt;T</i>   | <i>p.(Gln3036*)</i>        | PV |
| E307 | tumor | BRCA1 | NM_007294.3 | <i>g.41244214_41244217del</i> | <i>c.3331_3334del</i> | <i>p.(Gln1111Asnfs*5)</i>  | PV |
| E309 | tumor | BRCA2 | NM_000059.3 | <i>g.32937506G&gt;C</i>       | <i>c.8167G&gt;C</i>   | <i>p.(Asp2723His)</i>      | PV |
| E310 | tumor | BRCA1 | NM_007294.3 | <i>g.41246367del</i>          | <i>c.1181del</i>      | <i>p.(Gly394Valfs*16)</i>  | PV |
| E311 | tumor | BRCA1 | NM_007294.3 | <i>g.41243741del</i>          | <i>c.3803del</i>      | <i>p.(Asn1268Metfs*7)</i>  | PV |
| E312 | tumor | BRCA2 | NM_000059.3 | <i>g.32912427del</i>          | <i>c.3935del</i>      | <i>p.(Asn1312Ilefs*23)</i> | PV |
| E313 | tumor | BRCA1 | NM_007294.3 | <i>g.41256139_41276113dup</i> | <i>c.1_441dup</i>     | <i>p.(Gln148Metfs*28)</i>  | PV |
| E314 | tumor | BRCA2 | NM_000059.3 | <i>g.32929059_32929060del</i> | <i>c.7069_7070del</i> | <i>p.(Leu2357Valfs*2)</i>  | PV |
| E315 | tumor | BRCA1 | NM_007294.3 | <i>g.41245592_41245595del</i> | <i>c.1953_1956del</i> | <i>p.(Lys653Serfs*47)</i>  | PV |
| E316 | tumor | BRCA1 | NM_007294.3 | <i>g.41215926C&gt;T</i>       | <i>c.5117G&gt;A</i>   | <i>p.(Gly1706Glu)</i>      | PV |
| E317 | tumor | BRCA1 | NM_007294.3 | <i>g.41222942C&gt;G</i>       | <i>c.4986+3G&gt;C</i> | <i>p.?</i>                 | PV |
| E318 | tumor | BRCA1 | NM_007294.3 | <i>g.41243513del</i>          | <i>c.4035del</i>      | <i>p.(Glu1346Lysfs*20)</i> | PV |
| E319 | tumor | BRCA1 | NM_007294.3 | <i>g.41223179_41223191del</i> | <i>c.4740_4752del</i> | <i>p.(Glu1581Glnfs*16)</i> | PV |
| E321 | tumor | BRCA2 | NM_000059.3 | <i>g.32914349G&gt;T</i>       | <i>c.5857G&gt;T</i>   | <i>p.(Glu1953*)</i>        | PV |
| E323 | tumor | BRCA1 | NM_007294.3 | <i>g.41226414G&gt;A</i>       | <i>c.4609C&gt;T</i>   | <i>p.(Gln1537*)</i>        | PV |
| E324 | tumor | BRCA1 | NM_007294.3 | <i>g.41203079C&gt;G</i>       | <i>c.5332+1G&gt;C</i> | <i>p.?</i>                 | PV |
| E325 | tumor | BRCA1 | NM_007294.3 | <i>g.41226347C&gt;T</i>       | <i>c.4675+1G&gt;A</i> | <i>p.?</i>                 | PV |
| E326 | tumor | BRCA1 | NM_007294.3 | <i>g.41234422del</i>          | <i>c.4356del</i>      | <i>p.(Ala1453Glnfs*3)</i>  | PV |
| E327 | tumor | BRCA1 | NM_007294.3 | <i>g.41226500C&gt;T</i>       | <i>c.4523G&gt;A</i>   | <i>p.(Trp1508*)</i>        | PV |
| E328 | tumor | BRCA1 | NM_007294.3 | <i>g.41246503C&gt;A</i>       | <i>c.1045G&gt;T</i>   | <i>p.(Glu349*)</i>         | PV |
| E330 | tumor | BRCA2 | NM_000059.3 | <i>g.32912200dup</i>          | <i>c.3708dup</i>      | <i>p.(Ala1237Serfs*6)</i>  | PV |
| E331 | tumor | BRCA1 | NM_007294.3 | <i>g.41244188del</i>          | <i>c.3360del</i>      | <i>p.(Asn1121Ilefs*8)</i>  | PV |

|      |       |       |             |                                     |                            |                            |    |
|------|-------|-------|-------------|-------------------------------------|----------------------------|----------------------------|----|
| E332 | tumor | BRCA1 | NM_007294.3 | <i>g.41209080dup</i>                | <i>c.5266dup</i>           | <i>p.(Gln1756Profs*74)</i> | PV |
| E333 | tumor | BRCA1 | NM_007294.3 | <i>g.41245834C&gt;A</i>             | <i>c.1714G&gt;T</i>        | <i>p.(Glu572*)</i>         | PV |
| E334 | tumor | BRCA2 | NM_000059.3 | <i>g.32913730dup</i>                | <i>c.5238dup</i>           | <i>p.(Asn1747*)</i>        | PV |
| E335 | tumor | BRCA1 | NM_007294.3 | <i>g.41244558_41244559dup</i>       | <i>c.2989_2990dup</i>      | <i>p.(Asn997Lysfs*4)</i>   | PV |
| E336 | tumor | BRCA1 | NM_007294.3 | <i>g.41244447del</i>                | <i>c.3101del</i>           | <i>p.(Asn1034Metfs*14)</i> | PV |
| E337 | tumor | BRCA1 | NM_007294.3 | NA                                  | <i>exon 13 duplication</i> | NA                         | PV |
| E338 | tumor | BRCA1 | NM_007294.3 | <i>g.41243844_41243848del</i>       | <i>c.3700_3704del</i>      | <i>p.(Val1234Glnfs*8)</i>  | PV |
| E339 | tumor | BRCA1 | NM_007294.3 | <i>g.41203080_41203134del</i>       | <i>c.5278_5332del</i>      | <i>p.(Phe1761Asnfs*14)</i> | PV |
| E340 | tumor | BRCA1 | NM_007294.3 | <i>g.41243713del</i>                | <i>c.3835del</i>           | <i>p.(Ala1279Hisfs*28)</i> | PV |
| E341 | tumor | BRCA1 | NM_007294.3 | <i>g.41251792_41251793del</i>       | <i>c.546_547del</i>        | <i>p.(Gly183Ilefs*2)</i>   | PV |
| E342 | tumor | BRCA1 | NM_007294.3 | <i>g.41244063del</i>                | <i>c.3485del</i>           | <i>p.(Asp1162Valfs*48)</i> | PV |
| E343 | tumor | BRCA1 | NM_007294.3 | <i>g.41209080dup</i>                | <i>c.5266dup</i>           | <i>p.(Gln1756Profs*74)</i> | PV |
| E344 | tumor | BRCA1 | NM_007294.3 | <i>g.41209080dup</i>                | <i>c.5266dup</i>           | <i>p.(Gln1756Profs*74)</i> | PV |
| E346 | tumor | BRCA1 | NM_007294.3 | <i>g.41245136_41245137del</i>       | <i>c.2411_2412del</i>      | <i>p.(Gln804Leufs*5)</i>   | PV |
| E347 | tumor | BRCA1 | NM_007294.3 | <i>g.41226348_41226538del</i>       | <i>c.4485_4675del</i>      | <i>p.(Ser1496Glyfs*14)</i> | PV |
| E348 | tumor | BRCA1 | NM_007294.3 | <i>g.41243777_41243778del</i>       | <i>c.3770_3771del</i>      | <i>p.(Glu1257Glyfs*9)</i>  | PV |
| E349 | tumor | BRCA2 | NM_000059.3 | <i>g.32930687C&gt;T</i>             | <i>c.7558C&gt;T</i>        | <i>p.(Arg2520*)</i>        | PV |
| E350 | tumor | BRCA2 | NM_000059.3 | <i>g.32912037_32912038del</i>       | <i>c.3545_3546del</i>      | <i>p.(Phe1182*)</i>        | PV |
| E352 | tumor | BRCA1 | NM_007294.3 | <i>g.41245136_41245137del</i>       | <i>c.2411_2412del</i>      | <i>p.(Gln804Leufs*5)</i>   | PV |
| E353 | tumor | BRCA1 | NM_007294.3 | <i>g.41258504A&gt;C</i>             | <i>c.181T&gt;G</i>         | <i>p.(Cys61Gly)</i>        | PV |
| E356 | tumor | BRCA1 | NM_007294.3 | <i>g.41223242G&gt;T</i>             | <i>c.4689C&gt;A</i>        | <i>p.(Tyr1563*)</i>        | PV |
| E357 | tumor | BRCA1 | NM_007294.3 | <i>g.41245210G&gt;A</i>             | <i>c.2338C&gt;T</i>        | <i>p.(Gln780*)</i>         | PV |
| E358 | tumor | BRCA2 | NM_000059.3 | <i>g.32903606_32903607del</i>       | <i>c.658_659del</i>        | <i>p.(Val220Ilefs*4)</i>   | PV |
| E360 | tumor | BRCA2 | NM_000059.3 | <i>g.32906545_32906546del</i>       | <i>c.930_931del</i>        | <i>p.(Cys311Phefs*3)</i>   | PV |
| E361 | tumor | BRCA2 | NM_000059.3 | <i>g.32914137C&gt;A</i>             | <i>c.5645C&gt;A</i>        | <i>p.(Ser1882*)</i>        | PV |
| E362 | tumor | BRCA1 | NM_007294.3 | <i>g.41244910C&gt;A</i>             | <i>c.2638G&gt;T</i>        | <i>p.(Glu880*)</i>         | PV |
| E364 | tumor | BRCA2 | NM_000059.3 | <i>g.32912069del</i>                | <i>c.3577del</i>           | <i>p.(Ala1193Leufs*4)</i>  | PV |
| E365 | tumor | BRCA2 | NM_000059.3 | <i>g.32890640_32890641insAAAATT</i> | <i>c.43_44insAAAATT</i>    | <i>p.(Phe15*)</i>          | PV |
| E366 | tumor | BRCA1 | NM_007294.3 | <i>g.41209080dup</i>                | <i>c.5266dup</i>           | <i>p.(Gln1756Profs*74)</i> | PV |
| E367 | tumor | BRCA1 | NM_007294.3 | <i>g.41209068C&gt;G</i>             | <i>c.5277+1G&gt;C</i>      | <i>p.?</i>                 | PV |
| E368 | tumor | BRCA1 | NM_007294.3 | <i>g.41276045_41276046del</i>       | <i>c.68_69del</i>          | <i>p.(Glu23Valfs*17)</i>   | PV |
| E370 | tumor | BRCA2 | NM_000059.3 | <i>g.32929059_32929060del</i>       | <i>c.7069_7070del</i>      | <i>p.(Leu2357Valfs*2)</i>  | PV |
| E372 | tumor | BRCA1 | NM_007294.3 | <i>g.41222939A&gt;C</i>             | <i>c.4986+6T&gt;G</i>      | <i>p.?</i>                 | PV |
| E374 | tumor | BRCA2 | NM_000059.3 | <i>g.32910799dup</i>                | <i>c.2307dup</i>           | <i>p.(Ile770Tyrfs*18)</i>  | PV |

|      |       |       |             |                               |                             |                            |    |
|------|-------|-------|-------------|-------------------------------|-----------------------------|----------------------------|----|
| E375 | tumor | BRCA1 | NM_007294.3 | <i>g.41258504A&gt;C</i>       | <i>c.181T&gt;G</i>          | <i>p.(Cys61Gly)</i>        | PV |
| E376 | tumor | BRCA2 | NM_000059.3 | <i>g.32913804del</i>          | <i>c.5312del</i>            | <i>p.(Gly1771Valfs*6)</i>  | PV |
| E377 | tumor | BRCA1 | NM_007294.3 | <i>g.41246040_41246044del</i> | <i>c.1504_1508del</i>       | <i>p.(Leu502Alafs*2)</i>   | PV |
| E378 | tumor | BRCA1 | NM_007294.3 | NA                            | <i>exons 1-7 deletion</i>   | NA                         | PV |
| E379 | tumor | BRCA1 | NM_007294.3 | NA                            | <i>exons 21-24 deletion</i> | NA                         | PV |
| E380 | tumor | BRCA1 | NM_007294.3 | <i>g.41245189del</i>          | <i>c.2359del</i>            | <i>p.(Glu787Lysfs*5)</i>   | PV |
| E381 | tumor | BRCA1 | NM_007294.3 | <i>g.41244803del</i>          | <i>c.2745del</i>            | <i>p.(Asn916Ilefs*84)</i>  | PV |
| E382 | tumor | BRCA2 | NM_000059.3 | <i>g.32912603C&gt;T</i>       | <i>c.4111C&gt;T</i>         | <i>p.(Gln1371*)</i>        | PV |
| E383 | tumor | BRCA1 | NM_007294.3 | <i>g.41209080dup</i>          | <i>c.5266dup</i>            | <i>p.(Gln1756Profs*74)</i> | PV |
| E389 | tumor | BRCA2 | NM_000059.3 | <i>g.32920978C&gt;T</i>       | <i>c.6952C&gt;T</i>         | <i>p.(Arg2318*)</i>        | PV |
| E391 | tumor | BRCA1 | NM_007294.3 | <i>g.41243473G&gt;A</i>       | <i>c.4075C&gt;T</i>         | <i>p.(Gln1359*)</i>        | PV |
| E392 | tumor | BRCA1 | NM_007294.3 | <i>g.41258497A&gt;T</i>       | <i>c.188T&gt;A</i>          | <i>p.(Leu63*)</i>          | PV |
| E396 | tumor | BRCA1 | NM_007294.3 | <i>g.41267745_41267746del</i> | <i>c.131_132del</i>         | <i>p.(Cys44*)</i>          | PV |
| E397 | tumor | BRCA1 | NM_007294.3 | <i>g.41258504A&gt;C</i>       | <i>c.181T&gt;G</i>          | <i>p.(Cys61Gly)</i>        | PV |
| E400 | tumor | BRCA1 | NM_007294.3 | <i>g.41246035T&gt;A</i>       | <i>c.1513A&gt;T</i>         | <i>p.(Lys505*)</i>         | PV |
| E401 | tumor | BRCA1 | NM_007294.3 | <i>g.41244263del</i>          | <i>c.3285del</i>            | <i>p.(Lys1095Asnfs*14)</i> | PV |
| E402 | tumor | BRCA2 | NM_000059.3 | <i>g.32930687C&gt;T</i>       | <i>c.7558C&gt;T</i>         | <i>p.(Arg2520*)</i>        | PV |
| E403 | tumor | BRCA1 | NM_007294.3 | <i>g.41244057_41244067del</i> | <i>c.3481_3491del</i>       | <i>p.(Glu1161Phefs*3)</i>  | PV |
| E404 | tumor | BRCA2 | NM_000059.3 | <i>g.32906939del</i>          | <i>c.1324del</i>            | <i>p.(Ser442Glnfs*18)</i>  | PV |
| E406 | tumor | BRCA1 | NM_007294.3 | <i>g.41243922del</i>          | <i>c.3626del</i>            | <i>p.(Leu1209*)</i>        | PV |

Supplementary table 4

## Tumor VUS list

| Patient number | Sample | Gene  | Reference   | gDNA                          | cDNA                        | Protein               | Variant |
|----------------|--------|-------|-------------|-------------------------------|-----------------------------|-----------------------|---------|
| E4             | tumor  | BRCA1 | NM_007294.3 | <i>g.41228598G&gt;A</i>       | <i>c.4391C&gt;T</i>         | <i>p.(Pro1464Leu)</i> | VUS     |
| E9             | tumor  | BRCA1 | NM_007294.3 | <i>g.41243999T&gt;A</i>       | <i>c.3549A&gt;T</i>         | <i>p.(Lys1183Asn)</i> | VUS     |
| E25            | tumor  | BRCA2 | NM_000059.3 | <i>g.32972493A&gt;G</i>       | <i>c.9843A&gt;G</i>         | <i>p.(Pro3281=)</i>   | VUS     |
| E26            | tumor  | BRCA1 | NM_007294.3 | <i>g.41209141T&gt;A</i>       | <i>c.5205A&gt;T</i>         | <i>p.(Glu1735Asp)</i> | VUS     |
| E27            | tumor  | BRCA1 | NM_007294.3 | <i>g.41234417A&gt;G</i>       | <i>c.4357+4T&gt;C</i>       | <i>p.?</i>            | VUS     |
| E28            | tumor  | BRCA2 | NM_000059.3 | <i>g.32893344A&gt;G</i>       | <i>c.198A&gt;G</i>          | <i>p.(Gln66=)</i>     | VUS     |
| E29            | tumor  | BRCA1 | NM_007294.3 | <i>g.41244124C&gt;G</i>       | <i>c.3424G&gt;C</i>         | <i>p.(Ala1142Pro)</i> | VUS     |
| E36            | tumor  | BRCA2 | NM_000059.3 | <i>g.32911172G&gt;A</i>       | <i>c.2680G&gt;A</i>         | <i>p.(Val894Ile)</i>  | VUS     |
| E38            | tumor  | BRCA2 | NM_000059.3 | <i>g.32911172G&gt;A</i>       | <i>c.2680G&gt;A</i>         | <i>p.(Val894Ile)</i>  | VUS     |
| E43            | tumor  | BRCA1 | NM_007294.3 | <i>g.41219643G&gt;A</i>       | <i>c.5056C&gt;T</i>         | <i>p.(His1686Tyr)</i> | VUS     |
| E46            | tumor  | BRCA1 | NM_007294.3 | <i>g.41199671T&gt;C</i>       | <i>c.5456A&gt;G</i>         | <i>p.(Asn1819Ser)</i> | VUS     |
| E53            | tumor  | BRCA1 | NM_007294.3 | <i>g.41231391G&gt;T</i>       | <i>c.4358-2760C&gt;A</i>    | <i>p.?</i>            | VUS     |
| E55            | tumor  | BRCA2 | NM_000059.3 | <i>g.32911107A&gt;G</i>       | <i>c.2615A&gt;G</i>         | <i>p.(Lys872Arg)</i>  | VUS     |
| E61            | tumor  | BRCA2 | NM_000059.3 | <i>g.32930688G&gt;A</i>       | <i>c.7559G&gt;A</i>         | <i>p.(Arg2520Gln)</i> | VUS     |
| E64            | tumor  | BRCA1 | NM_007294.3 | <i>g.41246897A&gt;G</i>       | <i>c.671-20T&gt;C</i>       | <i>p.?</i>            | VUS     |
| E69            | tumor  | BRCA1 | NM_007294.3 | <i>g.41256900C&gt;G</i>       | <i>c.286G&gt;C</i>          | <i>p.(Asp96His)</i>   | VUS     |
| E69            | tumor  | BRCA1 | NM_007294.3 | <i>g.41256953C&gt;T</i>       | <i>c.233G&gt;A</i>          | <i>p.(Arg78Lys)</i>   | VUS     |
| E71            | tumor  | BRCA2 | NM_000059.3 | <i>g.32953891A&gt;G</i>       | <i>c.8958A&gt;G</i>         | <i>p.(Ile2986Met)</i> | VUS     |
| E72            | tumor  | BRCA2 | NM_000059.3 | <i>g.32910922C&gt;G</i>       | <i>c.2430C&gt;G</i>         | <i>p.(Thr810=)</i>    | VUS     |
| E73            | tumor  | BRCA2 | NM_000059.3 | <i>g.32971116A&gt;G</i>       | <i>c.9583A&gt;G</i>         | <i>p.(Thr3195Ala)</i> | VUS     |
| E75            | tumor  | BRCA1 | NM_007294.3 | <i>g.41228656_41228660del</i> | <i>c.4358-25_4358-29del</i> | <i>p.?</i>            | VUS     |
| E81            | tumor  | BRCA1 | NM_007294.3 | <i>g.41209160dup</i>          | <i>c.5194-8dup</i>          | <i>p.?</i>            | VUS     |
| E83            | tumor  | BRCA2 | NM_000059.3 | <i>g.32906788G&gt;T</i>       | <i>c.1173G&gt;T</i>         | <i>p.(Leu391Phe)</i>  | VUS     |
| E106           | tumor  | BRCA2 | NM_000059.3 | <i>g.32918676A&gt;G</i>       | <i>c.6842-19A&gt;G</i>      | <i>p.?</i>            | VUS     |
| E107           | tumor  | BRCA2 | NM_000059.3 | <i>g.32914814C&gt;T</i>       | <i>c.6322C&gt;T</i>         | <i>p.(Arg2108Cys)</i> | VUS     |
| E110           | tumor  | BRCA1 | NM_007294.3 | <i>g.41215947C&gt;T</i>       | <i>c.5096G&gt;A</i>         | <i>p.(Arg1699Gln)</i> | VUS     |
| E112           | tumor  | BRCA2 | NM_000059.3 | <i>g.32972674G&gt;A</i>       | <i>c.10024G&gt;A</i>        | <i>p.(Glu3342Lys)</i> | VUS     |
| E113           | tumor  | BRCA2 | NM_000059.3 | <i>g.32968810T&gt;C</i>       | <i>c.9257-16T&gt;C</i>      | <i>p.?</i>            | VUS     |
| E115           | tumor  | BRCA1 | NM_007294.3 | <i>g.41215953C&gt;A</i>       | <i>c.5090G&gt;T</i>         | <i>p.(Cys1697Phe)</i> | VUS     |
| E117           | tumor  | BRCA2 | NM_000059.3 | <i>g.32906546T&gt;C</i>       | <i>c.931T&gt;C</i>          | <i>p.(Cys311Arg)</i>  | VUS     |
| E119           | tumor  | BRCA1 | NM_007294.3 | <i>g.41215947C&gt;T</i>       | <i>c.5096G&gt;A</i>         | <i>p.(Arg1699Gln)</i> | VUS     |
| E121           | tumor  | BRCA2 | NM_000059.3 | <i>g.32914809T&gt;C</i>       | <i>c.6317T&gt;C</i>         | <i>p.(Leu2106Pro)</i> | VUS     |
| E127           | tumor  | BRCA2 | NM_000059.3 | <i>g.32915198G&gt;A</i>       | <i>c.6706G&gt;A</i>         | <i>p.(Glu2236Lys)</i> | VUS     |
| E128           | tumor  | BRCA2 | NM_000059.3 | <i>g.32900727C&gt;A</i>       | <i>c.608C&gt;A</i>          | <i>p.(Thr203Asn)</i>  | VUS     |
| E130           | tumor  | BRCA2 | NM_000059.3 | <i>g.32906558T&gt;A</i>       | <i>c.943T&gt;A</i>          | <i>p.(Cys315Ser)</i>  | VUS     |
| E132           | tumor  | BRCA2 | NM_000059.3 | <i>g.32936808G&gt;A</i>       | <i>c.7954G&gt;A</i>         | <i>p.(Val2652Met)</i> | VUS     |
| E136           | tumor  | BRCA1 | NM_007294.3 | <i>g.41246414G&gt;T</i>       | <i>c.1134C&gt;A</i>         | <i>p.(Ser378Arg)</i>  | VUS     |
| E145           | tumor  | BRCA1 | NM_007294.3 | <i>g.41256340A&gt;T</i>       | <i>c.302-62T&gt;A</i>       | <i>p.?</i>            | VUS     |
| E146           | tumor  | BRCA1 | NM_007294.3 | <i>g.41245419G&gt;C</i>       | <i>c.2129C&gt;G</i>         | <i>p.(Thr710Ser)</i>  | VUS     |
| E156           | tumor  | BRCA2 | NM_000059.3 | <i>g.32912562T&gt;G</i>       | <i>c.4070T&gt;G</i>         | <i>p.(Leu1357Arg)</i> | VUS     |
| E159           | tumor  | BRCA1 | NM_007294.3 | <i>g.41223224G&gt;A</i>       | <i>c.4707C&gt;T</i>         | <i>p.(Ser1569=)</i>   | VUS     |
| E168           | tumor  | BRCA1 | NM_007294.3 | <i>g.41228500C&gt;T</i>       | <i>c.4484+5G&gt;A</i>       | <i>p.?</i>            | VUS     |
| E172           | tumor  | BRCA1 | NM_007294.3 | <i>g.41244857T&gt;A</i>       | <i>c.2691A&gt;T</i>         | <i>p.(Pro897=)</i>    | VUS     |
| E172           | tumor  | BRCA2 | NM_000059.3 | <i>g.32954231T&gt;C</i>       | <i>c.9205T&gt;C</i>         | <i>p.(Cys3069Arg)</i> | VUS     |
| E174           | tumor  | BRCA2 | NM_000059.3 | <i>g.32920983A&gt;C</i>       | <i>c.6957A&gt;C</i>         | <i>p.(Arg2319Ser)</i> | VUS     |
| E180           | tumor  | BRCA1 | NM_007294.3 | <i>g.41209144A&gt;C</i>       | <i>c.5202T&gt;G</i>         | <i>p.(Phe1734Leu)</i> | VUS     |
| E180           | tumor  | BRCA1 | NM_007294.3 | <i>g.41244756A&gt;G</i>       | <i>c.2792T&gt;C</i>         | <i>p.(Val931Ala)</i>  | VUS     |
| E183           | tumor  | BRCA1 | NM_007294.3 | <i>g.41251811C&gt;T</i>       | <i>c.528G&gt;A</i>          | <i>p.(Thr176=)</i>    | VUS     |

|      |       |       |             |                                    |                            |                       |     |
|------|-------|-------|-------------|------------------------------------|----------------------------|-----------------------|-----|
| E189 | tumor | BRCA2 | NM_000059.3 | <i>g.32937507A&gt;T</i>            | <i>c.8168A&gt;T</i>        | <i>p.(Asp2723Val)</i> | VUS |
| E192 | tumor | BRCA2 | NM_000059.3 | <i>g.32911188A&gt;T</i>            | <i>c.2696A&gt;T</i>        | <i>p.(Asn899Ile)</i>  | VUS |
| E193 | tumor | BRCA1 | NM_007294.3 | <i>g.41245977G&gt;A</i>            | <i>c.1571C&gt;T</i>        | <i>p.(Ala524Val)</i>  | VUS |
| E197 | tumor | BRCA2 | NM_000059.3 | <i>g.32937326G&gt;A</i>            | <i>c.7987G&gt;A</i>        | <i>p.Glu2663Lys</i>   | VUS |
| E204 | tumor | BRCA2 | NM_000059.3 | <i>g.32914756T&gt;C</i>            | <i>c.6264T&gt;C</i>        | <i>p.(Thr2088=)</i>   | VUS |
| E206 | tumor | BRCA1 | NM_007294.3 | <i>g.41276034C&gt;T</i>            | <i>c.80G&gt;A</i>          | <i>p.(Cys27Tyr)</i>   | VUS |
| E207 | tumor | BRCA2 | NM_000059.3 | <i>g.32893426C&gt;T</i>            | <i>c.280C&gt;T</i>         | <i>p.(Pro94Ser)</i>   | VUS |
| E208 | tumor | BRCA2 | NM_000059.3 | <i>g.32914127G&gt;A</i>            | <i>c.5635G&gt;A</i>        | <i>p.(Glu1879Lys)</i> | VUS |
| E216 | tumor | BRCA2 | NM_000059.3 | <i>g.32910605G&gt;A</i>            | <i>c.2113G&gt;A</i>        | <i>p.(Glu705Lys)</i>  | VUS |
| E217 | tumor | BRCA1 | NM_007294.3 | <i>g.41245067T&gt;C</i>            | <i>c.2481A&gt;G</i>        | <i>p.(Glu827=)</i>    | VUS |
| E218 | tumor | BRCA2 | NM_000059.3 | <i>g.32913309C&gt;T</i>            | <i>c.4817C&gt;T</i>        | <i>p.(Ser1606Phe)</i> | VUS |
| E221 | tumor | BRCA2 | NM_000059.3 | <i>g.32906859A&gt;G</i>            | <i>c.1244A&gt;G</i>        | <i>p.(His415Arg)</i>  | VUS |
| E228 | tumor | BRCA1 | NM_007294.3 | <i>g.41219680_41219682del</i>      | <i>c.5017_5019del</i>      | <i>p.(His1673del)</i> | VUS |
| E228 | tumor | BRCA2 | NM_000059.3 | <i>g.32911436A&gt;C</i>            | <i>c.2944A&gt;C</i>        | <i>p.(Ile982Leu)</i>  | VUS |
| E229 | tumor | BRCA2 | NM_000059.3 | <i>g.32913894C&gt;T</i>            | <i>c.5402C&gt;T</i>        | <i>p.(Pro1801Leu)</i> | VUS |
| E230 | tumor | BRCA1 | NM_007294.3 | <i>g.41276094C&gt;T</i>            | <i>c.20G&gt;A</i>          | <i>p.(Arg7His)</i>    | VUS |
| E230 | tumor | BRCA2 | NM_000059.3 | <i>g.32911745C&gt;T</i>            | <i>c.3253C&gt;T</i>        | <i>p.(His1085Tyr)</i> | VUS |
| E231 | tumor | BRCA2 | NM_000059.3 | <i>g.32914656T&gt;G</i>            | <i>c.6164T&gt;G</i>        | <i>p.(Phe2055Cys)</i> | VUS |
| E235 | tumor | BRCA1 | NM_007294.3 | <i>g.41243899A&gt;G</i>            | <i>c.3649T&gt;C</i>        | <i>p.(Ser1217Pro)</i> | VUS |
| E243 | tumor | BRCA2 | NM_000059.3 | <i>g.32911323A&gt;T</i>            | <i>c.2831A&gt;T</i>        | <i>p.(Lys944Ile)</i>  | VUS |
| E245 | tumor | BRCA1 | NM_007294.3 | <i>g.41243614T&gt;A</i>            | <i>c.3934A&gt;T</i>        | <i>p.(Thr1312Ser)</i> | VUS |
| E249 | tumor | BRCA2 | NM_000059.3 | <i>g.32907165A&gt;G</i>            | <i>c.1550A&gt;G</i>        | <i>p.(Asn517Ser)</i>  | VUS |
| E253 | tumor | BRCA2 | NM_000059.3 | <i>g.32914250G&gt;C</i>            | <i>c.5758G&gt;C</i>        | <i>p.(Val1920Leu)</i> | VUS |
| E256 | tumor | BRCA2 | NM_000059.3 | <i>g.32914174C&gt;T</i>            | <i>c.5682C&gt;T</i>        | <i>p.(Tyr1894=)</i>   | VUS |
| E259 | tumor | BRCA2 | NM_000059.3 | <i>g.32929059C&gt;G</i>            | <i>c.7069C&gt;G</i>        | <i>p.(Leu2357Val)</i> | VUS |
| E261 | tumor | BRCA2 | NM_000059.3 | <i>g.32907380A&gt;G</i>            | <i>c.1765A&gt;G</i>        | <i>p.(Lys589Glu)</i>  | VUS |
| E264 | tumor | BRCA1 | NM_007294.3 | <i>g.41201173C&gt;A</i>            | <i>c.5371G&gt;T</i>        | <i>p.(Val1791Leu)</i> | VUS |
| E270 | tumor | BRCA2 | NM_000059.3 | <i>g.32930620_32930622del</i>      | <i>c.7491_7493del</i>      | <i>p.(Lys2498del)</i> | VUS |
| E279 | tumor | BRCA2 | NM_000059.3 | <i>g.32930633C&gt;T</i>            | <i>c.7504C&gt;T</i>        | <i>p.(Arg2502Cys)</i> | VUS |
| E281 | tumor | BRCA2 | NM_000059.3 | <i>g.32953549G&gt;A</i>            | <i>c.8850G&gt;A</i>        | <i>p.(Lys2950=)</i>   | VUS |
| E285 | tumor | BRCA2 | NM_000059.3 | <i>g.32968854C&gt;A</i>            | <i>c.9285C&gt;A</i>        | <i>p.(Asp3095Glu)</i> | VUS |
| E293 | tumor | BRCA2 | NM_000059.3 | <i>g.32914789A&gt;T</i>            | <i>c.6297A&gt;T</i>        | <i>p.(Arg2099Ser)</i> | VUS |
| E295 | tumor | BRCA2 | NM_000059.3 | <i>g.32906446T&gt;G</i>            | <i>c.831T&gt;G</i>         | <i>p.(Asn277Lys)</i>  | VUS |
| E297 | tumor | BRCA1 | NM_007294.3 | <i>g.41244703C&gt;A</i>            | <i>c.2845G&gt;T</i>        | <i>p.(Gly949Cys)</i>  | VUS |
| E300 | tumor | BRCA2 | NM_000059.3 | <i>g.32929337T&gt;C</i>            | <i>c.7347T&gt;C</i>        | <i>p.(Ile2449=)</i>   | VUS |
| E303 | tumor | BRCA2 | NM_000059.3 | <i>g.32914707C&gt;G</i>            | <i>c.6215C&gt;G</i>        | <i>p.(Ser2072Cys)</i> | VUS |
| E304 | tumor | BRCA1 | NM_007294.3 | <i>g.41244850T&gt;A</i>            | <i>c.2698A&gt;T</i>        | <i>p.(Thr900Ser)</i>  | VUS |
| E307 | tumor | BRCA2 | NM_000059.3 | <i>g.32913919C&gt;T</i>            | <i>c.5427C&gt;T</i>        | <i>p.(Cys1809=)</i>   | VUS |
| E308 | tumor | BRCA2 | NM_000059.3 | <i>g.32945129C&gt;T</i>            | <i>c.8524C&gt;T</i>        | <i>p.(Arg2842Cys)</i> | VUS |
| E320 | tumor | BRCA1 | NM_007294.3 | <i>g.41197771A&gt;G</i>            | <i>c.5516T&gt;C</i>        | <i>p.(Leu1839Ser)</i> | VUS |
| E322 | tumor | BRCA2 | NM_000059.3 | <i>g.32914229T&gt;C</i>            | <i>c.5737T&gt;C</i>        | <i>p.(Cys1913Arg)</i> | VUS |
| E329 | tumor | BRCA1 | NM_007294.3 | <i>g.41245448_41245449delinsAG</i> | <i>c.2099_2100delinsCT</i> | <i>p.(Leu700Pro)</i>  | VUS |
| E331 | tumor | BRCA2 | NM_000059.3 | <i>g.32937655A&gt;C</i>            | <i>c.8316A&gt;C</i>        | <i>p.(Glu2772Asp)</i> | VUS |
| E336 | tumor | BRCA2 | NM_000059.3 | <i>g.32911295G&gt;C</i>            | <i>c.2803G&gt;C</i>        | <i>p.(Asp935His)</i>  | VUS |
| E341 | tumor | BRCA1 | NM_007294.3 | <i>g.41251828T&gt;A</i>            | <i>c.511A&gt;T</i>         | <i>p.(Ile171Leu)</i>  | VUS |
| E345 | tumor | BRCA1 | NM_007294.3 | <i>g.41245667G&gt;C</i>            | <i>c.1881C&gt;G</i>        | <i>p.(Val627=)</i>    | VUS |
| E351 | tumor | BRCA2 | NM_000059.3 | <i>g.32929432T&gt;C</i>            | <i>c.7435+7T&gt;C</i>      | <i>p.?</i>            | VUS |
| E354 | tumor | BRCA1 | NM_007294.3 | <i>g.41234451G&gt;C</i>            | <i>c.4327C&gt;G</i>        | <i>p.(Arg1443Gly)</i> | VUS |
| E355 | tumor | BRCA2 | NM_000059.3 | <i>g.32972280G&gt;A</i>            | <i>c.9649-19G&gt;A</i>     | <i>p.?</i>            | VUS |
| E359 | tumor | BRCA2 | NM_000059.3 | <i>g.32907392G&gt;T</i>            | <i>c.1777G&gt;T</i>        | <i>p.(Ala593Ser)</i>  | VUS |
| E361 | tumor | BRCA2 | NM_000059.3 | <i>g.32893444A&gt;G</i>            | <i>c.298A&gt;G</i>         | <i>p.(Lys100Glu)</i>  | VUS |

|      |       |       |             |                               |                       |                             |     |
|------|-------|-------|-------------|-------------------------------|-----------------------|-----------------------------|-----|
| E363 | tumor | BRCA1 | NM_007294.3 | <i>g.41215947C&gt;T</i>       | <i>c.5096G&gt;A</i>   | <i>p.(Arg1699Gln)</i>       | VUS |
| E369 | tumor | BRCA1 | NM_007294.3 | <i>g.41243512C&gt;T</i>       | <i>c.4036G&gt;A</i>   | <i>p.(Glu1346Lys)</i>       | VUS |
| E371 | tumor | BRCA1 | NM_007294.3 | <i>g.41276049A&gt;G</i>       | <i>c.65T&gt;C</i>     | <i>p.(Leu22Ser)</i>         | VUS |
| E373 | tumor | BRCA1 | NM_007294.3 | <i>g.41222976A&gt;G</i>       | <i>c.4955T&gt;C</i>   | <i>p.(Met1652Thr)</i>       | VUS |
| E384 | tumor | BRCA2 | NM_000059.3 | <i>g.32910842A&gt;G</i>       | <i>c.2350A&gt;G</i>   | <i>p.(Met784Val)</i>        | VUS |
| E385 | tumor | BRCA2 | NM_000059.3 | <i>g.32937526G&gt;T</i>       | <i>c.8187G&gt;T</i>   | <i>p.(Lys2729Asn)</i>       | VUS |
| E386 | tumor | BRCA2 | NM_000059.3 | <i>g.32910842A&gt;G</i>       | <i>c.2350A&gt;G</i>   | <i>p.(Met784Val)</i>        | VUS |
| E387 | tumor | BRCA1 | NM_007294.3 | <i>g.41223202A&gt;G</i>       | <i>c.4729T&gt;C</i>   | <i>p.(Ser1577Pro)</i>       | VUS |
| E388 | tumor | BRCA1 | NM_007294.3 | <i>g.41222974C&gt;A</i>       | <i>c.4957G&gt;T</i>   | <i>p.(Val1653Leu)</i>       | VUS |
| E389 | tumor | BRCA2 | NM_000059.3 | <i>g.32914623G&gt;T</i>       | <i>c.6131G&gt;T</i>   | <i>p.(Gly2044Val)</i>       | VUS |
| E390 | tumor | BRCA1 | NM_007294.3 | <i>g.41244435T&gt;G</i>       | <i>c.3113A&gt;C</i>   | <i>p.(Glu1038Ala)</i>       | VUS |
| E390 | tumor | BRCA1 | NM_007294.3 | <i>g.41246883A&gt;C</i>       | <i>c.671-6T&gt;G</i>  | <i>p.?</i>                  | VUS |
| E392 | tumor | BRCA2 | NM_000059.3 | <i>g.32910842A&gt;G</i>       | <i>c.2350A&gt;G</i>   | <i>p.(Met784Val)</i>        | VUS |
| E393 | tumor | BRCA2 | NM_000059.3 | <i>g.32906890A&gt;G</i>       | <i>c.1275A&gt;G</i>   | <i>p.(Glu425=)</i>          | VUS |
| E394 | tumor | BRCA2 | NM_000059.3 | <i>g.32910842A&gt;G</i>       | <i>c.2350A&gt;G</i>   | <i>p.(Met784Val)</i>        | VUS |
| E395 | tumor | BRCA2 | NM_000059.3 | <i>g.32930610G&gt;A</i>       | <i>c.7481G&gt;A</i>   | <i>p.(Arg2494Gln)</i>       | VUS |
| E398 | tumor | BRCA2 | NM_000059.3 | <i>g.32972303C&gt;G</i>       | <i>c.9653C&gt;G</i>   | <i>p.(Ser3218Cys)</i>       | VUS |
| E399 | tumor | BRCA2 | NM_000059.3 | <i>g.32968840G&gt;T</i>       | <i>c.9271G&gt;T</i>   | <i>p.(Val3091Phe)</i>       | VUS |
| E400 | tumor | BRCA1 | NM_007294.3 | <i>g.41245410_41245424del</i> | <i>c.2124_2138del</i> | <i>p.(Phe709_Ser713del)</i> | VUS |
| E405 | tumor | BRCA2 | NM_000059.3 | <i>g.32907233C&gt;A</i>       | <i>c.1618C&gt;A</i>   | <i>p.(Leu540Met)</i>        | VUS |



Supplementary table 5  
Germline PV list

| Patient number | Sample | Gene  | Reference   | gDNA                              | cDNA                      | Protein                    | Variant |
|----------------|--------|-------|-------------|-----------------------------------|---------------------------|----------------------------|---------|
| E16            | blood  | BRCA2 | NM_000059.3 | <i>g.32914401C&gt;A</i>           | <i>c.5909C&gt;A</i>       | <i>p.(Ser1970*)</i>        | PV      |
| E17            | blood  | BRCA1 | NM_007294.3 | <i>g.41258545C&gt;A</i>           | <i>c.140G&gt;T</i>        | <i>p.(Cys47Phe)</i>        | PV      |
| E18            | blood  | BRCA1 | NM_007294.3 | <i>g.41243941G&gt;A</i>           | <i>c.3607C&gt;T</i>       | <i>p.(Arg1203*)</i>        | PV      |
| E20            | blood  | BRCA1 | NM_007294.3 | <i>g.41223147del</i>              | <i>c.4784del</i>          | <i>p.(Ser1595Phefs*6)</i>  | PV      |
| E23            | blood  | BRCA2 | NM_000059.3 | <i>g.32903578A&gt;G</i>           | <i>c.632-2A&gt;G</i>      | <i>p.?</i>                 | PV      |
| E24            | blood  | BRCA2 | NM_000059.3 | <i>g.32912872_32912873del</i>     | <i>c.4380_4381del</i>     | <i>p.(Ser1461Leufs*4)</i>  | PV      |
| E25            | blood  | BRCA2 | NM_000059.3 | <i>g.32913711T&gt;G</i>           | <i>c.5219T&gt;G</i>       | <i>p.(Leu1740*)</i>        | PV      |
| E31            | blood  | BRCA2 | NM_000059.3 | <i>g.32893421_32893424dup</i>     | <i>c.275_278dup</i>       | <i>p.(Pro94Ilefs*8)</i>    | PV      |
| E32            | blood  | BRCA1 | NM_007294.3 | <i>g.41251825del</i>              | <i>c.514del</i>           | <i>p.(Gln172Asnfs*62)</i>  | PV      |
| E33            | blood  | BRCA1 | NM_007294.3 | <i>g.41215963C&gt;A</i>           | <i>c.5080G&gt;T</i>       | <i>p.(Glu1694*)</i>        | PV      |
| E36            | blood  | BRCA1 | NM_007294.3 | <i>g.41245587del</i>              | <i>c.1961del</i>          | <i>p.(Lys654Serfs*47)</i>  | PV      |
| E37            | blood  | BRCA2 | NM_000059.3 | <i>g.32912941del</i>              | <i>c.4449del</i>          | <i>p.(Asp1484Thrfs*2)</i>  | PV      |
| E38            | blood  | BRCA1 | NM_007294.3 | <i>g.41245587del</i>              | <i>c.1961del</i>          | <i>p.(Lys654Serfs*47)</i>  | PV      |
| E39            | blood  | BRCA2 | NM_000059.3 | <i>g.32914516dup</i>              | <i>c.6024dup</i>          | <i>p.(Gln2009Alafs*9)</i>  | PV      |
| E40            | blood  | BRCA1 | NM_007294.3 | <i>g.41243611G&gt;A</i>           | <i>c.3937C&gt;T</i>       | <i>p.(Gln1313*)</i>        | PV      |
| E41            | blood  | BRCA1 | NM_007294.3 | <i>g.41244878del</i>              | <i>c.2670del</i>          | <i>p.(Ser891Profs*2)</i>   | PV      |
| E42            | blood  | BRCA2 | NM_000059.3 | <i>g.32913709_32913711delinsG</i> | <i>c.5217_5219delinsG</i> | <i>p.(Tyr1739*)</i>        | PV      |
| E44            | blood  | BRCA1 | NM_007294.3 | <i>g.41245189dup</i>              | <i>c.2359dup</i>          | <i>p.(Glu787Glyfs*3)</i>   | PV      |
| E47            | blood  | BRCA2 | NM_000059.3 | <i>g.32971034G&gt;T</i>           | <i>c.9502-1G&gt;T</i>     | <i>p.?</i>                 | PV      |
| E49            | blood  | BRCA2 | NM_000059.3 | <i>g.32945142_32945143del</i>     | <i>c.8537_8538del</i>     | <i>p.(Glu2846Glyfs*22)</i> | PV      |
| E51            | blood  | BRCA2 | NM_000059.3 | <i>g.32914068_32914071del</i>     | <i>c.5576_5579del</i>     | <i>p.(Ile1859Lysfs*3)</i>  | PV      |
| E52            | blood  | BRCA1 | NM_007294.3 | <i>g.41215906del</i>              | <i>c.5137del</i>          | <i>p.(Val1713*)</i>        | PV      |
| E54            | blood  | BRCA1 | NM_007294.3 | <i>g.41276045_41276046del</i>     | <i>c.68_69del</i>         | <i>p.(Glu23Valfs*17)</i>   | PV      |
| E57            | blood  | BRCA2 | NM_000059.3 | <i>g.32906398T&gt;G</i>           | <i>c.794-11T&gt;G</i>     | <i>p.?</i>                 | PV      |
| E58            | blood  | BRCA1 | NM_007294.3 | <i>g.41243921dup</i>              | <i>c.3627dup</i>          | <i>p.(Glu1210Argfs*9)</i>  | PV      |
| E59            | blood  | BRCA1 | NM_007294.3 | <i>g.41228505C&gt;A</i>           | <i>c.4484G&gt;T</i>       | <i>p.(Ala1453Glyfs*10)</i> | PV      |
| E60            | blood  | BRCA2 | NM_000059.3 | <i>g.32905145_32905149del</i>     | <i>c.771_775del</i>       | <i>p.(Asn257Lysfs*17)</i>  | PV      |
| E61            | blood  | BRCA2 | NM_000059.3 | <i>g.32944692C&gt;T</i>           | <i>c.8485C&gt;T</i>       | <i>p.(Gln2829*)</i>        | PV      |
| E63            | blood  | BRCA1 | NM_007294.3 | <i>g.41258495A&gt;G</i>           | <i>c.190T&gt;C</i>        | <i>p.(Cys64Arg)</i>        | PV      |
| E65            | blood  | BRCA2 | NM_000059.3 | <i>g.32914508_32914523dup</i>     | <i>c.6016_6031dup</i>     | <i>p.(Phe2011*)</i>        | PV      |
| E66            | blood  | BRCA1 | NM_007294.3 | <i>g.41244057_41244067del</i>     | <i>c.3481_3491del</i>     | <i>p.(Glu1161Phefs*3)</i>  | PV      |
| E67            | blood  | BRCA2 | NM_000059.3 | <i>g.32907212del</i>              | <i>c.1597del</i>          | <i>p.(Thr533Leufs*25)</i>  | PV      |
| E68            | blood  | BRCA1 | NM_007294.3 | <i>g.41245422_41245423insT</i>    | <i>c.2125_2126insA</i>    | <i>p.(Phe709Tyrfs*3)</i>   | PV      |
| E72            | blood  | BRCA1 | NM_007294.3 | <i>g.41244935_41244936insA</i>    | <i>c.2612_2613insT</i>    | <i>p.(Phe872Valfs*31)</i>  | PV      |
| E74            | blood  | BRCA1 | NM_007294.3 | <i>g.41246433C&gt;T</i>           | <i>c.1115G&gt;A</i>       | <i>p.(Trp372*)</i>         | PV      |
| E78            | blood  | BRCA2 | NM_000059.3 | <i>g.32913492C&gt;G</i>           | <i>c.5000C&gt;G</i>       | <i>p.(Ser1667*)</i>        | PV      |
| E79            | blood  | BRCA1 | NM_007294.3 | <i>g.41209068C&gt;T</i>           | <i>c.5277+1G&gt;A</i>     | <i>p.?</i>                 | PV      |
| E80            | blood  | BRCA1 | NM_007294.3 | <i>g.41203111A&gt;T</i>           | <i>c.5301T&gt;A</i>       | <i>p.(Cys1767*)</i>        | PV      |
| E82            | blood  | BRCA2 | NM_000059.3 | <i>g.32912890_32912894del</i>     | <i>c.4398_4402del</i>     | <i>p.(Leu1466Phefs*2)</i>  | PV      |
| E85            | blood  | BRCA2 | NM_000059.3 | <i>g.32915136_32915139del</i>     | <i>c.6644_6647del</i>     | <i>p.(Tyr2215Serfs*13)</i> | PV      |
| E87            | blood  | BRCA1 | NM_007294.3 | <i>g.41243557G&gt;A</i>           | <i>c.3991C&gt;T</i>       | <i>p.(Gln1331*)</i>        | PV      |
| E88            | blood  | BRCA1 | NM_007294.3 | <i>g.41258494C&gt;T</i>           | <i>c.191G&gt;A</i>        | <i>p.(Cys64Tyr)</i>        | PV      |
| E89            | blood  | BRCA1 | NM_007294.3 | <i>g.41244637del</i>              | <i>c.2911del</i>          | <i>p.(His971Metfs*29)</i>  | PV      |
| E90            | blood  | BRCA2 | NM_000059.3 | <i>g.32911943_32911944insGA</i>   | <i>c.3451_3452insGA</i>   | <i>p.(Ile1151Argfs*3)</i>  | PV      |
| E91            | blood  | BRCA1 | NM_007294.3 | <i>g.41243614_41243617del</i>     | <i>c.3931_3934del</i>     | <i>p.(Asn1311Profs*6)</i>  | PV      |
| E94            | blood  | BRCA1 | NM_007294.3 | <i>g.41244936delinsAA</i>         | <i>c.2612delinsTT</i>     | <i>p.(Pro871Leufs*32)</i>  | PV      |
| E95            | blood  | BRCA1 | NM_007294.3 | <i>g.41219666_41219669del</i>     | <i>c.5030_5033del</i>     | <i>p.(Thr1677Ilefs*2)</i>  | PV      |

|      |       |       |             |                                   |                           |                            |    |
|------|-------|-------|-------------|-----------------------------------|---------------------------|----------------------------|----|
| E96  | blood | BRCA2 | NM_000059.3 | <i>g.32903583_32903584del</i>     | <i>c.635_636del</i>       | <i>p.(Arg212Lysfs*2)</i>   | PV |
| E97  | blood | BRCA2 | NM_000059.3 | <i>g.32913457C&gt;A</i>           | <i>c.4965C&gt;A</i>       | <i>p.(Tyr1655*)</i>        | PV |
| E98  | blood | BRCA1 | NM_007294.3 | <i>g.41245656dup</i>              | <i>c.1892dup</i>          | <i>p.(Ser632Lysfs*4)</i>   | PV |
| E99  | blood | BRCA1 | NM_007294.3 | <i>g.41209080dup</i>              | <i>c.5266dup</i>          | <i>p.(Gln1756Profs*74)</i> | PV |
| E100 | blood | BRCA1 | NM_007294.3 | <i>g.41197784G&gt;A</i>           | <i>c.5503C&gt;T</i>       | <i>p.(Arg1835*)</i>        | PV |
| E101 | blood | BRCA1 | NM_007294.3 | <i>g.41245874del</i>              | <i>c.1674del</i>          | <i>p.(Gly559Valfs*13)</i>  | PV |
| E106 | blood | BRCA2 | NM_000059.3 | <i>g.32914174C&gt;G</i>           | <i>c.5682C&gt;G</i>       | <i>p.(Tyr1894*)</i>        | PV |
| E108 | blood | BRCA2 | NM_000059.3 | <i>g.32915083_32915084del</i>     | <i>c.6591_6592del</i>     | <i>p.(Glu2198Asnfs*4)</i>  | PV |
| E109 | blood | BRCA2 | NM_000059.3 | <i>g.32911727dup</i>              | <i>c.3235dup</i>          | <i>p.(Ser1079Phefs*2)</i>  | PV |
| E111 | blood | BRCA1 | NM_007294.3 | <i>g.41209080dup</i>              | <i>c.5266dup</i>          | <i>p.(Gln1756Profs*74)</i> | PV |
| E116 | blood | BRCA1 | NM_007294.3 | <i>g.41215920G&gt;T</i>           | <i>c.5123C&gt;A</i>       | <i>p.(Ala1708Glu)</i>      | PV |
| E118 | blood | BRCA2 | NM_000059.3 | <i>g.32929170A&gt;T</i>           | <i>c.7180A&gt;T</i>       | <i>p.(Arg2394*)</i>        | PV |
| E122 | blood | BRCA1 | NM_007294.3 | <i>g.41245529del</i>              | <i>c.2019del</i>          | <i>p.(Glu673Aspfs*28)</i>  | PV |
| E123 | blood | BRCA2 | NM_000059.3 | <i>g.32914137C&gt;A</i>           | <i>c.5645C&gt;A</i>       | <i>p.(Ser1882*)</i>        | PV |
| E124 | blood | BRCA1 | NM_007294.3 | <i>g.41243789_41243792del</i>     | <i>c.3756_3759del</i>     | <i>p.(Ser1253Argfs*10)</i> | PV |
| E129 | blood | BRCA2 | NM_000059.3 | <i>g.32914438del</i>              | <i>c.5946del</i>          | <i>p.(Ser1982Argfs*22)</i> | PV |
| E135 | blood | BRCA1 | NM_007294.3 | <i>g.41267753del</i>              | <i>c.124del</i>           | <i>p.(Ile42Tyrfs*8)</i>    | PV |
| E137 | blood | BRCA2 | NM_000059.3 | <i>g.32914701_32914704del</i>     | <i>c.6209_6212del</i>     | <i>p.(Glu2070Valfs*10)</i> | PV |
| E140 | blood | BRCA1 | NM_007294.3 | <i>g.41215920G&gt;T</i>           | <i>c.5123C&gt;A</i>       | <i>p.(Ala1708Glu)</i>      | PV |
| E142 | blood | BRCA1 | NM_007294.3 | <i>g.41243611G&gt;A</i>           | <i>c.3937C&gt;T</i>       | <i>p.(Gln1313*)</i>        | PV |
| E143 | blood | BRCA2 | NM_000059.3 | <i>g.32931941dup</i>              | <i>c.7680dup</i>          | <i>p.(Gln2561Serfs*5)</i>  | PV |
| E144 | blood | BRCA1 | NM_007294.3 | <i>g.41243943dup</i>              | <i>c.3605dup</i>          | <i>p.(Tyr1202*)</i>        | PV |
| E147 | blood | BRCA2 | NM_000059.3 | <i>g.32914438del</i>              | <i>c.5946del</i>          | <i>p.(Ser1982Argfs*22)</i> | PV |
| E148 | blood | BRCA1 | NM_007294.3 | <i>g.41223063G&gt;C</i>           | <i>c.4868C&gt;G</i>       | <i>p.(Ala1623Gly)</i>      | PV |
| E150 | blood | BRCA2 | NM_000059.3 | <i>g.32913705_32913708del</i>     | <i>c.5213_5216del</i>     | <i>p.(Thr1738Ilefs*2)</i>  | PV |
| E151 | blood | BRCA2 | NM_000059.3 | <i>g.32913565dup</i>              | <i>c.5073dup</i>          | <i>p.(Trp1692Metfs*3)</i>  | PV |
| E152 | blood | BRCA1 | NM_007294.3 | <i>g.41243921dup</i>              | <i>c.3627dup</i>          | <i>p.(Glu1210Argfs*9)</i>  | PV |
| E152 | blood | BRCA2 | NM_000059.3 | <i>g.32911300_32911303del</i>     | <i>c.2808_2811del</i>     | <i>p.(Ala938Profs*21)</i>  | PV |
| E153 | blood | BRCA1 | NM_007294.3 | NA                                | <i>c.1-?_80+?del</i>      | NA                         | PV |
| E154 | blood | BRCA1 | NM_007294.3 | <i>g.41245279del</i>              | <i>c.2269del</i>          | <i>p.(Val757Phefs*8)</i>   | PV |
| E155 | blood | BRCA1 | NM_007294.3 | <i>g.41245033del</i>              | <i>c.2515del</i>          | <i>p.(His839Thrfs*7)</i>   | PV |
| E156 | blood | BRCA1 | NM_007294.3 | <i>g.41251790A&gt;T</i>           | <i>c.547+2T&gt;A</i>      | <i>p.?</i>                 | PV |
| E157 | blood | BRCA1 | NM_007294.3 | <i>g.41215906del</i>              | <i>c.5137del</i>          | <i>p.(Val1713*)</i>        | PV |
| E160 | blood | BRCA1 | NM_007294.3 | <i>g.41246532del</i>              | <i>c.1016del</i>          | <i>p.(Lys339Argfs*2)</i>   | PV |
| E161 | blood | BRCA2 | NM_000059.3 | <i>g.32914724G&gt;T</i>           | <i>c.6232G&gt;T</i>       | <i>p.(Gly2078*)</i>        | PV |
| E162 | blood | BRCA2 | NM_000059.3 | <i>g.32914343_32914346del</i>     | <i>c.5851_5854del</i>     | <i>p.(Ser1951Trpfs*11)</i> | PV |
| E163 | blood | BRCA1 | NM_007294.3 | <i>g.41244826C&gt;A</i>           | <i>c.2722G&gt;T</i>       | <i>p.(Glu908*)</i>         | PV |
| E165 | blood | BRCA1 | NM_007294.3 | <i>g.41246733dup</i>              | <i>c.815dup</i>           | <i>p.(Pro273Alafs*14)</i>  | PV |
| E166 | blood | BRCA1 | NM_007294.3 | <i>g.41246394C&gt;T</i>           | <i>c.1154G&gt;A</i>       | <i>p.(Trp385*)</i>         | PV |
| E169 | blood | BRCA1 | NM_007294.3 | <i>g.41251845dup</i>              | <i>c.494dup</i>           | <i>p.(Arg166Glufs*16)</i>  | PV |
| E171 | blood | BRCA1 | NM_007294.3 | <i>g.41219651_41219655delinsA</i> | <i>c.5044_5048delinsT</i> | <i>p.Glu1682*</i>          | PV |
| E175 | blood | BRCA1 | NM_007294.3 | <i>g.41219666_41219669del</i>     | <i>c.5030_5033del</i>     | <i>p.(Thr1677Ilefs*2)</i>  | PV |

Supplementary table 6  
Germline VUS list

| Patient number | Sample | Gene  | Reference   | <i>gDNA</i>             | <i>cDNA</i>            | <i>Protein</i>        | Variant |
|----------------|--------|-------|-------------|-------------------------|------------------------|-----------------------|---------|
| E25            | blood  | BRCA2 | NM_000059.3 | <i>g.32972493A&gt;G</i> | <i>c.9843A&gt;G</i>    | <i>p.(Pro3281=)</i>   | VUS     |
| E29            | blood  | BRCA1 | NM_007294.3 | <i>g.41244124C&gt;G</i> | <i>c.3424G&gt;C</i>    | <i>p.(Ala1142Pro)</i> | VUS     |
| E43            | blood  | BRCA1 | NM_007294.3 | <i>g.41219643G&gt;A</i> | <i>c.5056C&gt;T</i>    | <i>p.(His1686Tyr)</i> | VUS     |
| E46            | blood  | BRCA1 | NM_007294.3 | <i>g.41199671T&gt;C</i> | <i>c.5456A&gt;G</i>    | <i>p.(Asn1819Ser)</i> | VUS     |
| E61            | blood  | BRCA2 | NM_000059.3 | <i>g.32930688G&gt;A</i> | <i>c.7559G&gt;A</i>    | <i>p.(Arg2520Gln)</i> | VUS     |
| E64            | blood  | BRCA1 | NM_007294.3 | <i>g.41246897A&gt;G</i> | <i>c.671-20T&gt;C</i>  | <i>p.?</i>            | VUS     |
| E71            | blood  | BRCA2 | NM_000059.3 | <i>g.32953891A&gt;G</i> | <i>c.8958A&gt;G</i>    | <i>p.(Ile2986Met)</i> | VUS     |
| E73            | blood  | BRCA2 | NM_000059.3 | <i>g.32971116A&gt;G</i> | <i>c.9583A&gt;G</i>    | <i>p.(Thr3195Ala)</i> | VUS     |
| E89            | blood  | BRCA1 | NM_007294.3 | <i>g.41277532A&gt;C</i> | <i>c.-264T&gt;G</i>    | <i>p.?</i>            | VUS     |
| E99            | blood  | BRCA2 | NM_000059.3 | <i>g.32906471T&gt;C</i> | <i>c.856T&gt;C</i>     | <i>p.(Ser286Pro)</i>  | VUS     |
| E102           | blood  | BRCA2 | NM_000059.3 | <i>g.32936726T&gt;C</i> | <i>c.7872T&gt;C</i>    | <i>p.(Tyr2624=)</i>   | VUS     |
| E103           | blood  | BRCA1 | NM_007294.3 | <i>g.41197691G&gt;A</i> | <i>c.*4C&gt;T</i>      | <i>p.?</i>            | VUS     |
| E105           | blood  | BRCA2 | NM_000059.3 | <i>g.32906890A&gt;G</i> | <i>c.1275A&gt;G</i>    | <i>p.(Glu425=)</i>    | VUS     |
| E106           | blood  | BRCA2 | NM_000059.3 | <i>g.32918676A&gt;G</i> | <i>c.6842-19A&gt;G</i> | <i>p.?</i>            | VUS     |
| E112           | blood  | BRCA2 | NM_000059.3 | <i>g.32972674G&gt;A</i> | <i>c.10024G&gt;A</i>   | <i>p.(Glu3342Lys)</i> | VUS     |
| E121           | blood  | BRCA2 | NM_000059.3 | <i>g.32914809T&gt;C</i> | <i>c.6317T&gt;C</i>    | <i>p.(Leu2106Pro)</i> | VUS     |
| E127           | blood  | BRCA2 | NM_000059.3 | <i>g.32915198G&gt;A</i> | <i>c.6706G&gt;A</i>    | <i>p.(Glu2236Lys)</i> | VUS     |
| E128           | blood  | BRCA2 | NM_000059.3 | <i>g.32900727C&gt;A</i> | <i>c.608C&gt;A</i>     | <i>p.(Thr203Asn)</i>  | VUS     |
| E130           | blood  | BRCA2 | NM_000059.3 | <i>g.32906558T&gt;A</i> | <i>c.943T&gt;A</i>     | <i>p.(Cys315Ser)</i>  | VUS     |
| E132           | blood  | BRCA2 | NM_000059.3 | <i>g.32936808G&gt;A</i> | <i>c.7954G&gt;A</i>    | <i>p.(Val2652Met)</i> | VUS     |
| E136           | blood  | BRCA1 | NM_007294.3 | <i>g.41246414G&gt;T</i> | <i>c.1134C&gt;A</i>    | <i>p.(Ser378Arg)</i>  | VUS     |
| E156           | blood  | BRCA2 | NM_000059.3 | <i>g.32912562T&gt;G</i> | <i>c.4070T&gt;G</i>    | <i>p.(Leu1357Arg)</i> | VUS     |
| E159           | blood  | BRCA1 | NM_007294.3 | <i>g.41223224G&gt;A</i> | <i>c.4707C&gt;T</i>    | <i>p.(Ser1569=)</i>   | VUS     |
| E172           | blood  | BRCA2 | NM_000059.3 | <i>g.32954231T&gt;C</i> | <i>c.9205T&gt;C</i>    | <i>p.(Cys3069Arg)</i> | VUS     |
| E172           | blood  | BRCA1 | NM_007294.3 | <i>g.41244857T&gt;A</i> | <i>c.2691A&gt;T</i>    | <i>p.(Pro897=)</i>    | VUS     |

Supplementary table 7

## Somatic PV list

| Gene  | Nucleotide       | exon/intron | Protein                    | Type of variant |
|-------|------------------|-------------|----------------------------|-----------------|
| BRCA1 | c.1271del        | 11          | <i>p.(Gly424Valfs*6)</i>   | Frameshift      |
| BRCA1 | c.132C>G         | 3           | <i>p.(Cys44Trp)</i>        | Missense        |
| BRCA1 | c.1393del        | 11          | <i>p.(Tyr465ilefs*10)</i>  | Frameshift      |
| BRCA1 | c.1519A>T        | 11          | <i>p.(Arg507*)</i>         | Nonsense        |
| BRCA1 | c.1840A>T        | 11          | <i>p.(Lys614*)</i>         | Nonsense        |
| BRCA1 | c.1830del        | 11          | <i>p.(Arg610Serfs*2)</i>   | Frameshift      |
| BRCA1 | c.2125_2126insAG | 11          | <i>p.(Phe709*)</i>         | Frameshift      |
| BRCA1 | c.2269del        | 11          | <i>p.(Val757Phefs*8)</i>   | Frameshift      |
| BRCA1 | c.2927del        | 11          | <i>p.(Asn976Thrfs*24)</i>  | Frameshift      |
| BRCA1 | c.3700_3704del   | 11          | <i>p.(Val1234Glnfs*8)</i>  | Frameshift      |
| BRCA1 | c.3803_3804del   | 11          | <i>p.(Asn1268Argfs*4)</i>  | Frameshift      |
| BRCA1 | c.3818del        | 11          | <i>p.(Gln1273Argfs*2)</i>  | Frameshift      |
| BRCA1 | c.4484+3delinsTG | 14          | <i>p.?</i>                 | Frameshift      |
| BRCA1 | c.4527C>G        | 15          | <i>p.(Tyr1509*)</i>        | Nonsense        |
| BRCA1 | c.4573C>T        | 15          | <i>p.(Gln1525*)</i>        | Nonsense        |
| BRCA1 | c.4655dup        | 15          | <i>p.(Tyr1552*)</i>        | Frameshift      |
| BRCA1 | c.520C>T         | 8           | <i>p.(Gln174*)</i>         | Nonsense        |
| BRCA1 | c.523A>T         | 8           | <i>p.(Lys175*)</i>         | Nonsense        |
| BRCA1 | c.532_547+10del  | 8           | <i>p.(Val178Aspfs*51)</i>  | Frameshift      |
| BRCA1 | c.5407-1G>A      | 22          | <i>p.?</i>                 | Splice          |
| BRCA1 | c.65_66delinsG   | 2           | <i>p.(Leu22Trpfs*9)</i>    | Frameshift      |
| BRCA1 | c.976G>T         | 11          | <i>p.(Glu326*)</i>         | Nonsense        |
| BRCA2 | c.3038C>A        | 11          | <i>p.(Ser1013*)</i>        | Nonsense        |
| BRCA2 | c.5297dup        | 11          | <i>p.(Asn1766Lysfs*2)</i>  | Frameshift      |
| BRCA2 | c.5946del        | 11          | <i>p.(Ser1982Argfs*22)</i> | Frameshift      |
| BRCA2 | c.5946del        | 11          | <i>p.(Ser1982Argfs*22)</i> | Frameshift      |
| BRCA2 | c.6407T>G        | 11          | <i>p.(Leu2136*)</i>        | Nonsense        |
| BRCA2 | c.6952C>T        | 13          | <i>p.(Arg2318*)</i>        | Nonsense        |
| BRCA2 | c.7065_7068del   | 14          | <i>p.(Glu2355Aspfs*11)</i> | Frameshift      |
